# Supplementary material for: Single-cell multi-omics analysis identifies two distinct phenotypes of newly-onset microscopic polyangiitis
Source: PubMed Central journal article supplement (PMC10567716; doi:10.1038/s41467-023-41328-0), 2023-10-11
Supplement: 41467_2023_41328_MOESM1_ESM.pdf [file 41467_2023_41328_MOESM1_ESM.pdf]

**Supplementary information for:**

**Single-cell multi-omics analysis identifies two distinct phenotypes of newly-onset microscopic polyangiitis**

Correspondence to:

Masayuki Nishide (nishide@imed3.med.Osaka-u.ac.jp), Department of Respiratory Medicine and Clinical Immunology, Graduate School of Medicine, Osaka University, Suita, Osaka, Japan.

Atsushi Kumanogoh (kumanogo@imed3.med.osaka-u.ac.jp), Department of Respiratory Medicine and Clinical Immunology, Graduate School of Medicine, Osaka University, Suita, Osaka, Japan.

This file includes supplementary tables 1 – 11 and supplementary figures 1-13.

## Supplementary Table 1.

### Characteristics of eight patients with microscopic polyangiitis and seven healthy donors recruited for CITE-seq and CyTOF.

| Patients with MPA                                   |                                           |                            |       |                                                      |        |       |        |        |        |       |
|-----------------------------------------------------|-------------------------------------------|----------------------------|-------|------------------------------------------------------|--------|-------|--------|--------|--------|-------|
| Patient No.                                         |                                           | 1                          | 2     | 3                                                    | 4      | 5     | 6      | 7      | 8      |       |
| Age                                                 |                                           | 79                         | 81    | 44                                                   | 69     | 70    | 81     | 52     | 75     |       |
| Sex                                                 |                                           | Female                     | Male  | Male                                                 | Female | Male  | Male   | Female | Female |       |
| Medication                                          |                                           | None                       | None  | None                                                 | None   | None  | None   | None   | None   |       |
| New/Worse/Persistent                                |                                           | New                        | New   | New                                                  | New    | New   | New    | New    | New    |       |
| Consideration when applying classification criteria |                                           |                            |       | *Described in the Methods "Patient profiles" section |        |       |        |        |        |       |
| Classification criteria for MPA                     | Nasal involvement                         | -3                         | -     | -                                                    | -      | -     | -3     | -      | -      |       |
|                                                     | MPO-ANCA positive                         | 6                          | 6     | 6                                                    | 6      | 6     | 6      | 6      | 6      |       |
|                                                     | Interstitial lung disease                 | 3                          | 3     | -                                                    | 3      | 3     | 3      | 3      | -      |       |
|                                                     | Pauci-immune glomerulonephritis on biopsy | -                          | -     | 3                                                    | -      | -     | -      | -      | 3      |       |
|                                                     | PR3-ANCA positive                         | -                          | -     | -                                                    | -      | -     | -      | -      | -      |       |
|                                                     | Blood eosinophil count                    | -                          | -     | -                                                    | -      | -     | -      | -      | -      |       |
|                                                     | SUM                                       | 6                          | 9     | 9                                                    | 9      | 9     | 6      | 9      | 9      |       |
| BVAS                                                | General                                   | 3                          | 3     | 0                                                    | 2      | 0     | 0      | 1      | 0      |       |
|                                                     | Cutaneous                                 | 0                          | 0     | 0                                                    | 0      | 0     | 0      | 2      | 0      |       |
|                                                     | Mucous membranes/Eyes                     | 0                          | 0     | 0                                                    | 0      | 0     | 6      | 0      | 0      |       |
|                                                     | ENT                                       | 6                          | 0     | 0                                                    | 6      | 0     | 6      | 0      | 3      |       |
|                                                     | Chest                                     | 4                          | 0     | 0                                                    | 0      | 3     | 0      | 0      | 0      |       |
|                                                     | Cardiovascular                            | 0                          | 0     | 0                                                    | 0      | 0     | 0      | 0      | 0      |       |
|                                                     | Renal                                     | 0                          | 10    | 12                                                   | 0      | 6     | 0      | 0      | 0      |       |
|                                                     | Nervous system                            | 0                          | 0     | 0                                                    | 0      | 9     | 0      | 6      | 9      |       |
| SUM                                                 | 13                                        | 13                         | 12    | 8                                                    | 18     | 12    | 9      | 12     |        |       |
| Blood Count                                         | White Blood Cells                         | / $\mu$ L                  | 13180 | 10440                                                | 7210   | 6670  | 9810   | 9070   | 8320   | 13110 |
|                                                     | Neutrophils                               | / $\mu$ L                  | 11190 | 9072                                                 | 4333   | 5616  | 7308   | 6095   | 5366   | 11379 |
|                                                     | Lymphocytes                               | / $\mu$ L                  | 1002  | 606                                                  | 2278   | 680   | 1884   | 2222   | 1473   | 1468  |
|                                                     | Monocytes                                 | / $\mu$ L                  | 764   | 355                                                  | 490    | 267   | 432    | 590    | 291    | 223   |
|                                                     | Eosinophils                               | / $\mu$ L                  | 185   | 376                                                  | 58     | 100   | 147    | 136    | 1173   | 13    |
|                                                     | Basophils                                 | / $\mu$ L                  | 40    | 31                                                   | 50     | 7     | 39     | 27     | 17     | 26    |
|                                                     | Hemoglobin                                | g/dL                       | 9.4   | 7.5                                                  | 12.2   | 6.5   | 12.0   | 12.6   | 10.7   | 9.6   |
|                                                     | Platelets                                 | $\times 10^4$ / $\mu$ L    | 50.6  | 35.9                                                 | 27     | 29.8  | 39.5   | 26.1   | 37.6   | 36.6  |
| Urine                                               | Occult Blood (Semi-Quantitative)          | mg/dL                      | N.D.  | 0.20                                                 | 0.50   | 0.03  | 0.20   | 0.06   | N.D.   | 0.03  |
|                                                     | Up/Ucr                                    | mg/g Cr                    | 0.13  | 0.37                                                 | 0.98   | N.D.  | N.D.   | 0.16   | 0.14   | 0.09  |
| Biochemical                                         | Urea Nitrogen                             | mg/dL                      | 10    | 14                                                   | 37     | 15    | 18     | 21     | 7      | 12    |
|                                                     | Creatinine                                | mg/dL                      | 0.61  | 1.11                                                 | 2.45   | 0.67  | 1.00   | 1.18   | 0.51   | 0.54  |
|                                                     | eGFR                                      | mL/min/1.73 m <sup>2</sup> | 70.3  | 49.4                                                 | 24.7   | 65.9  | 57.3   | 46.0   | 96.4   | 81.5  |
|                                                     | CRP                                       | mg/dL                      | 11.37 | 13.44                                                | < 0.04 | 8.92  | 5.90   | 4.04   | 3.89   | 7.87  |
| Immunological                                       | MPO-ANCA                                  | IU/mL                      | 226.0 | 1730.0                                               | 1130.0 | 17.2  | 1690.0 | 22.0   | 261.0  | 76.5  |
|                                                     | PR3-ANCA                                  | IU/mL                      | 2.2   | < 1.0                                                | < 1.0  | < 1.0 | 1.4    | < 1.0  | < 1.0  | < 1.0 |

  

| Healthy Donors |      |        |        |        |      |        |      |
|----------------|------|--------|--------|--------|------|--------|------|
| Sample No.     | 1    | 2      | 3      | 4      | 5    | 6      | 7    |
| Age            | 27   | 36     | 64     | 62     | 33   | 62     | 70   |
| Sex            | Male | Female | Female | Female | Male | Female | Male |

MPA; Microscopic polyangiitis, BVAS; Birmingham Vasculitis Activity Score 2008 ver.3, ENT; Eyes, nose, and throat, Up/Ucr; Urine protein/urine creatinine ratio, eGFR; Estimated glomerular filtration rate, CRP; C-reactive protein, MPO; Myeloperoxidase, PR3; Proteinase 3, ANCA; Anti-neutrophil cytoplasmic antibody, N.D.; Not detected.

**Supplementary Table 2.**

**Pseudo-bulk differential expressed genes (DEG) analysis in PBMCs derived from patients with MPA and healthy donors.**

| <b>a</b>  |             |          | <b>b</b>  |             |          |
|-----------|-------------|----------|-----------|-------------|----------|
| Gene Name | Fold Change | P-value  | Gene Name | Fold Change | P-value  |
| SOCS3     | 5.53        | 2.20E-03 | MT2A      | 1.62        | 3.23E-02 |
| S100A12   | 4.78        | 1.53E-02 | SLC2A3    | 1.62        | 3.62E-02 |
| S100A8    | 4.55        | 1.62E-02 | PRDM1     | 1.62        | 4.24E-02 |
| S100A9    | 3.29        | 3.89E-03 | PYCARD    | 1.62        | 3.61E-03 |
| MT-ATP8   | 3.04        | 3.79E-02 | RAB31     | 1.62        | 6.82E-03 |
| PTPRCAP   | 2.93        | 3.33E-02 | FKBP5     | 1.62        | 6.23E-03 |
| PLBD1     | 2.88        | 3.22E-03 | TESC      | 1.61        | 1.06E-03 |
| RPS10     | 2.56        | 4.41E-02 | FCN1      | 1.61        | 1.07E-02 |
| FPR1      | 2.43        | 9.87E-03 | UBALD2    | 1.60        | 7.48E-02 |
| NAMPT     | 2.37        | 4.20E-02 | SERPINB1  | 1.60        | 3.34E-04 |
| VCAN      | 2.19        | 6.40E-03 | CEBPD     | 1.60        | 3.79E-02 |
| IFI6      | 2.01        | 5.04E-02 | EPSTI1    | 1.60        | 6.11E-02 |
| BCL2A1    | 1.96        | 8.09E-02 | SOD2      | 1.59        | 4.56E-02 |
| GCA       | 1.87        | 7.75E-04 | IGSF6     | 1.59        | 4.23E-02 |
| PIM3      | 1.86        | 5.13E-02 | TIMP2     | 1.59        | 1.39E-02 |
| FCGR2A    | 1.86        | 1.28E-02 | GRN       | 1.59        | 2.50E-03 |
| CD14      | 1.86        | 1.62E-02 | GPRIN3    | 1.58        | 2.81E-02 |
| GLUL      | 1.85        | 3.15E-03 | AGTRAP    | 1.58        | 2.74E-03 |
| CD69      | 1.83        | 6.63E-02 | TYMP      | 1.58        | 1.19E-02 |
| NEAT1     | 1.82        | 6.12E-02 | MS4A6A    | 1.57        | 2.28E-02 |
| SERPINA1  | 1.81        | 8.27E-03 | NAIP      | 1.57        | 1.93E-02 |
| SLC11A1   | 1.81        | 3.11E-03 | IFITM2    | 1.57        | 3.35E-03 |
| IFITM3    | 1.80        | 4.93E-02 | UPP1      | 1.57        | 1.83E-03 |
| TNFSF13B  | 1.79        | 8.72E-03 | CTSB      | 1.56        | 1.75E-03 |
| BLVRB     | 1.78        | 2.57E-03 | C19orf38  | 1.56        | 6.44E-03 |
| LYZ       | 1.78        | 1.54E-02 | LGALS3    | 1.55        | 4.71E-03 |
| TSPO      | 1.77        | 1.35E-03 | GNG10     | 1.55        | 2.19E-03 |
| TIMP1     | 1.76        | 2.93E-04 | ISG15     | 1.55        | 3.32E-02 |
| LILRA5    | 1.76        | 2.02E-02 | VIM       | 1.55        | 1.98E-03 |
| TALDO1    | 1.75        | 2.16E-04 | CD63      | 1.54        | 3.58E-03 |
| PGD       | 1.73        | 2.18E-03 | BLVRA     | 1.54        | 3.94E-03 |
| IFI30     | 1.72        | 4.48E-03 | TNFSF10   | 1.54        | 1.74E-02 |
| LILRB3    | 1.71        | 1.73E-02 | CEBPD     | 1.54        | 6.56E-02 |
| LGALS1    | 1.70        | 1.99E-03 | S100A10   | 1.54        | 1.02E-02 |
| PLSCR1    | 1.70        | 1.52E-02 | SQOR      | 1.53        | 9.04E-04 |
| MNDA      | 1.69        | 2.77E-02 | CTSA      | 1.53        | 7.93E-04 |
| PIM1      | 1.67        | 2.01E-02 | H2AFJ     | 1.52        | 3.23E-03 |
| VAMP5     | 1.67        | 3.48E-02 | NFKBIZ    | 1.52        | 5.37E-02 |
| NFKBIA    | 1.67        | 1.02E-01 | FOS       | 1.52        | 1.88E-01 |
| GAPDH     | 1.66        | 1.09E-04 | MYC       | 1.51        | 1.09E-01 |
| S100A11   | 1.66        | 9.36E-03 | S100A4    | 1.51        | 1.47E-02 |
| CTSD      | 1.65        | 4.60E-03 | AIF1      | 1.51        | 3.84E-02 |
| S100A6    | 1.65        | 2.21E-02 | CD302     | 1.51        | 3.44E-02 |
| CAPG      | 1.64        | 4.28E-05 | NCF4      | 1.51        | 1.44E-03 |
| BCL3      | 1.64        | 7.43E-02 | C4orf48   | 1.50        | 2.55E-02 |
| MSRB1     | 1.63        | 9.14E-03 | DDIT4     | 1.50        | 3.19E-02 |

  

| CD14 Mono-Signature genes | Interferon-Signature genes |
|---------------------------|----------------------------|
| MS4A6A                    | ISG15                      |
| NAIP                      | IFITM3                     |
| LILRB3                    | IFITM2                     |
| RAB31                     | IFI6                       |
| PLSCR1                    | NFKBIA                     |
| CD14                      | CD69                       |
| SLC11A1                   | SOCS3                      |
| FPR1                      | SOD2                       |
| CD302                     | TNFSF10                    |
| AIF1                      | PLSCR1                     |
| LILRA5                    | PIM1                       |
| BLVRA                     | UPP1                       |
| CEBPD                     | IFI30                      |
| SOD2                      | VAMP5                      |
| S100A8                    | MT2A                       |
| LYZ                       | EPSTI1                     |
| FCN1                      | IFI44                      |
| MNDA                      | IFI44L                     |
| S100A9                    |                            |
| S100A12                   |                            |
| VCAN                      |                            |
| CTSD                      |                            |
| NEAT1                     |                            |
| IGSF6                     |                            |
| CAPG                      |                            |
| IFI30                     |                            |
| TYMP                      |                            |
| EPSTI1                    |                            |
| TNFSF10                   |                            |
| TSPO                      |                            |
| SERPINB1                  |                            |
| TALDO1                    |                            |
| FCGR2A                    |                            |
| S100A4                    |                            |
| PLBD1                     |                            |
| SLC2A3                    |                            |
| CTSA                      |                            |
| FOS                       |                            |
| NFKBIA                    |                            |
| PYCARD                    |                            |

**(a)** The top 100 genes significantly upregulated in PBMCs derived from patients with MPA compared to healthy donors. *P*-values are calculated using two-sided Wilcoxon Rank Sum test. **(b)** A list of the genes related to CD14<sup>+</sup> monocyte signature genes and interferon signature genes.

**Supplementary Table 3.****List of highly expressed genes in B cells derived from patients in MPA-IFN group compared to patients in MPA-MONO group.**

| <b>Gene Name</b> | <b>Fold Change</b> | <b>P-value</b> |
|------------------|--------------------|----------------|
| MTRNR2L12        | 1.22               | 1.70E-87       |
| MT-ATP6          | 1.07               | 4.78E-80       |
| RPS10            | 0.858              | 5.28E-71       |
| HLA-DPB1         | 0.848              | 1.41E-124      |
| IGKC             | 0.729              | 5.83E-08       |
| TCL1A            | 0.712              | 1.79E-35       |
| HLA-DPA1         | 0.672              | 3.24E-81       |
| IFI44L           | 0.653              | 6.72E-40       |
| HLA-DQB1         | 0.593              | 7.61E-49       |
| IFITM1           | 0.565              | 7.41E-28       |
| IGHD             | 0.553              | 1.62E-29       |
| LY6E             | 0.526              | 1.96E-33       |
| TSPAN13          | 0.514              | 3.52E-41       |
| HLA-DRA          | 0.504              | 1.35E-75       |
| IGHM             | 0.491              | 2.47E-22       |
| PCBP2            | 0.482              | 1.32E-21       |
| HLA-DQA1         | 0.480              | 4.26E-37       |
| XAF1             | 0.477              | 5.31E-24       |
| CD37             | 0.430              | 4.69E-41       |
| MX1              | 0.428              | 8.64E-22       |
| RNASE6           | 0.425              | 1.68E-25       |
| HLA-DMA          | 0.418              | 7.60E-28       |
| HVCN1            | 0.417              | 6.11E-24       |
| MT-ND4           | 0.409              | 7.97E-25       |
| CD79B            | 0.397              | 2.28E-22       |
| SELL             | 0.372              | 5.61E-16       |
| IFITM2           | 0.350              | 2.95E-18       |
| HLA-DOB          | 0.350              | 6.89E-19       |
| NAPSA            | 0.343              | 1.36E-23       |
| TRBC2            | 0.343              | 4.58E-14       |
| FCMR             | 0.341              | 7.06E-16       |
| CORO1A           | 0.339              | 4.45E-16       |
| HLA-DMB          | 0.330              | 1.92E-16       |
| POLD4            | 0.325              | 3.84E-13       |
| MT-CO2           | 0.321              | 1.60E-12       |
| HLA-DRB1         | 0.314              | 2.63E-25       |
| SRSF5            | 0.309              | 1.24E-16       |
| NIBAN3           | 0.308              | 4.73E-09       |
| RPS4X            | 0.301              | 4.80E-14       |
| CD72             | 0.297              | 7.94E-11       |
| FCRL1            | 0.293              | 1.23E-11       |
| SP110            | 0.291              | 4.20E-11       |
| SNHG5            | 0.290              | 7.17E-11       |
| BIRC3            | 0.284              | 1.40E-09       |
| PTPN6            | 0.283              | 1.86E-10       |
| CD22             | 0.281              | 4.96E-09       |

The top 50 genes significantly upregulated in B cells derived from patients in MPA-IFN group compared to patients in MPA-MONO group. *P*-values are calculated using two-sided Wilcoxon Rank Sum test.

**Supplementary Table 4.**  
**Clinical course of patients MPA-1, MPA-3, and MPA-5.**

|                                | MPA-MONO                         |                            | MPA-IFN          |                     | MPA-IFN          |                 |      |        |
|--------------------------------|----------------------------------|----------------------------|------------------|---------------------|------------------|-----------------|------|--------|
|                                | Before-treatment                 | After-treatment            | Before-treatment | After-treatment     | Before-treatment | After-treatment |      |        |
| Patient No.                    | 1                                | 1                          | 3                | 3                   | 5                | 5               |      |        |
| Age                            | 79                               | 79                         | 44               | 45                  | 70               | 70              |      |        |
| Sex                            | Female                           | Female                     | Male             | Male                | Male             | Male            |      |        |
| Medication                     | None                             | GC + MMF                   | None             | GC + IVCY<br>-> MMF | None             | GC + IVCY       |      |        |
| Duration of treatment (months) | 0                                | 4                          | 0                | 12                  | 0                | 2               |      |        |
| New/Worse/Persistent           | New                              | Worse                      | New              | Persistent          | New              | Persistent      |      |        |
| BVAS                           | General                          | 3                          | 0                | 0                   | 0                | 0               |      |        |
|                                | Cutaneous                        | 0                          | 0                | 0                   | 0                | 0               |      |        |
|                                | Mucous membranes/Eyes            | 0                          | 3                | 0                   | 0                | 0               |      |        |
|                                | ENT                              | 6                          | 3                | 0                   | 0                | 0               |      |        |
|                                | Chest                            | 4                          | 0                | 3                   | 0                | 3               |      |        |
|                                | Cardiovascular                   | 0                          | 6                | 0                   | 0                | 0               |      |        |
|                                | Renal                            | 0                          | 0                | 6                   | 4                | 6               |      |        |
|                                | Nervous system                   | 0                          | 0                | 9                   | 0                | 9               |      |        |
|                                | SUM                              | 13                         | 12               | 18                  | 4                | 18              |      |        |
|                                | 3                                |                            |                  |                     |                  |                 |      |        |
| Blood Count                    | White Blood Cells                | / $\mu$ L                  | 13180            | 15010               | 9810             | 9260            | 9810 | 8160   |
|                                | Neutrophils                      | / $\mu$ L                  | 11190            | 13734               | 7308             | 8278            | 7308 | 7254   |
|                                | Lymphocytes                      | / $\mu$ L                  | 1002             | 826                 | 1884             | 426             | 1884 | 693    |
|                                | Monocytes                        | / $\mu$ L                  | 764              | 375                 | 432              | 491             | 432  | 204    |
|                                | Eosinophils                      | / $\mu$ L                  | 185              | 45                  | 147              | 19              | 147  | 0      |
|                                | Basophils                        | / $\mu$ L                  | 40               | 30                  | 39               | 46              | 39   | 8      |
|                                | Hemoglobin                       | g/dL                       | 9.4              | 13.9                | 12.0             | 10.8            | 12.0 | 12.8   |
| Urine                          | Pletelets                        | $\times 10^4$ / $\mu$ L    | 50.6             | 29.7                | 39.5             | 31.0            | 39.5 | 15.0   |
|                                | Occult Blood (Semi-Quantitative) | mg/dL                      | N.D.             | N.D.                | 0.20             | 0.03            | 0.20 | 0.10   |
| Biochemical                    | Up/Ucr                           | mg/g Cr                    | 0.13             | 0.07                | N.D.             | 0.31            | N.D. | N.D.   |
|                                | Urea Nitrogen                    | mg/dL                      | 10               | 27                  | 18               | 38              | 18   | 25     |
|                                | Creatinine                       | mg/dL                      | 0.61             | 0.84                | 1.00             | 2.03            | 1.00 | 0.92   |
|                                | eGFR                             | mL/min/1.73 m <sup>2</sup> | 70.3             | 49.5                | 57.3             | 30.2            | 57.3 | 62.8   |
|                                | CRP                              | mg/dL                      | 11.37            | 4.55                | 5.90             | 0.04            | 5.90 | < 0.04 |
| Immunological                  | MPO-ANCA                         | IU/mL                      | 226              | 5                   | 1690             | 266             | 1690 | 264    |
|                                | PR3-ANCA                         | IU/mL                      | 2.2              | < 1.0               | 1.4              | N.A.            | 1.4  | N.A.   |

MPA; Microscopic polyangiitis, GC; glucocorticoids, MMF; mycophenolate mofetil, IVCY; intravenous cyclophosphamide, BVAS; Birmingham Vasculitis Activity Score 2008 ver.3, ENT; Eyes, nose, and throat, Up/Ucr; Urine protein/urine creatinine ratio, eGFR; Estimated glomerular filtration rate, CRP; C-reactive protein, MPO; Myeloperoxidase, PR3; Proteinase 3, ANCA; Anti-neutrophil cytoplasmic antibody, N.A.; Not assessed, N.D.; Not detected.

**Supplementary Table 5.**

**List of highly expressed genes in CD14 Mono\_Activated and CD14 Mono\_ISG subsets.**

| <b>CD14 Mono_Activated</b> |                    |                         | <b>CD14 Mono_ISG</b> |                    |                         |
|----------------------------|--------------------|-------------------------|----------------------|--------------------|-------------------------|
| <b>Gene Name</b>           | <b>Fold change</b> | <b>Adjusted P-value</b> | <b>Gene Name</b>     | <b>Fold change</b> | <b>Adjusted P-value</b> |
| S100A8                     | 1.29               | *                       | IFI6                 | 1.17               | *                       |
| S100A12                    | 1.19               | *                       | LY6E                 | 1.10               | *                       |
| NAMPT                      | 0.823              | *                       | IFITM3               | 1.07               | *                       |
| EGR1                       | 0.781              | 2.49E-187               | IFI44L               | 0.986              | *                       |
| S100A9                     | 0.740              | *                       | MX1                  | 0.959              | *                       |
| BCL2A1                     | 0.678              | 1.50E-278               | ISG15                | 0.900              | *                       |
| FOS                        | 0.674              | 1.22E-170               | FOLR3                | 0.755              | 2.02E-203               |
| RGS2                       | 0.635              | 8.81E-261               | XAF1                 | 0.705              | *                       |
| PLBD1                      | 0.633              | 2.81E-224               | IFI44                | 0.645              | *                       |
| ALOX5AP                    | 0.600              | 1.46E-280               | EPST11               | 0.605              | *                       |
| IER2                       | 0.556              | 1.56E-121               | RNF213               | 0.604              | *                       |
| DUSP1                      | 0.527              | 2.33E-138               | TYMP                 | 0.596              | *                       |
| SRGN                       | 0.508              | 6.80E-229               | MX2                  | 0.589              | *                       |
| S100A6                     | 0.506              | *                       | SIGLEC1              | 0.537              | *                       |
| SLC2A3                     | 0.479              | 2.18E-174               | IFIT3                | 0.515              | *                       |
| CYP1B1                     | 0.471              | 2.74E-180               | OAS2                 | 0.497              | *                       |
| SOD2                       | 0.449              | 5.55E-101               | TNFSF13B             | 0.479              | 2.87E-266               |
| KLF6                       | 0.430              | 2.97E-110               | OAS1                 | 0.467              | *                       |
| MCL1                       | 0.420              | 1.44E-98                | OAS3                 | 0.464              | *                       |
| H1FX                       | 0.417              | 3.90E-32                | IRF7                 | 0.456              | *                       |
| BTG2                       | 0.408              | 1.38E-64                | VCAN                 | 0.448              | 1.19E-217               |
| H3F3B                      | 0.406              | 5.24E-119               | PLSCR1               | 0.446              | 2.23E-262               |
| NCF1                       | 0.406              | 5.06E-158               | APOBEC3A             | 0.426              | 9.57E-253               |
| RBP7                       | 0.398              | 2.10E-117               | STAT1                | 0.424              | 5.60E-237               |
| JUN                        | 0.398              | 1.79E-70                | EIF2AK2              | 0.424              | *                       |
| PLAUR                      | 0.395              | 1.37E-75                | HERC5                | 0.417              | *                       |
| FPR1                       | 0.391              | 7.26E-118               | LAP3                 | 0.398              | 5.43E-225               |
| CTSD                       | 0.387              | 8.25E-150               | SCO2                 | 0.396              | 3.54E-201               |
| CDC42EP3                   | 0.373              | 4.87E-103               | IFITM2               | 0.392              | 2.41E-139               |
| ZFP36                      | 0.370              | 1.30E-63                | IFIT2                | 0.390              | *                       |
| STK17B                     | 0.358              | 6.97E-99                | STAT2                | 0.370              | 1.69E-194               |
| GCA                        | 0.351              | 4.07E-97                | TMEM176B             | 0.369              | 1.53E-116               |
| FOSB                       | 0.349              | 5.48E-68                | CD14                 | 0.363              | 8.60E-136               |
| SGK1                       | 0.346              | 1.00E-59                | PARP14               | 0.358              | 1.74E-192               |
| CEBPD                      | 0.344              | 1.52E-92                | TNFSF10              | 0.349              | 2.69E-137               |
| G0S2                       | 0.343              | 5.22E-116               | TMEM176A             | 0.348              | 4.58E-116               |
| SLC25A37                   | 0.337              | 1.52E-69                | BLVRA                | 0.341              | 2.84E-156               |
| TSPO                       | 0.332              | 8.65E-128               | IFIT1                | 0.339              | *                       |
| S100A4                     | 0.327              | 1.58E-143               | TMEM123              | 0.337              | 1.57E-152               |
| MYL6                       | 0.325              | 2.40E-100               | LGALS9               | 0.334              | 2.07E-149               |
| SLC11A1                    | 0.320              | 1.08E-79                | TRIM22               | 0.334              | 1.94E-165               |
| BASP1                      | 0.315              | 1.52E-100               | CLEC12A              | 0.328              | 2.74E-126               |
| CLU                        | 0.310              | 9.01E-66                | ADAR                 | 0.325              | 1.73E-146               |
| STXBP2                     | 0.310              | 2.50E-69                | MNDA                 | 0.322              | 3.62E-147               |
| NFIL3                      | 0.309              | 5.25E-106               | SAMD9L               | 0.321              | 1.56E-229               |
| ATP2B1-AS1                 | 0.304              | 5.66E-55                | PCBP2                | 0.319              | 6.17E-95                |
| SERPINB1                   | 0.303              | 2.47E-78                | FCN1                 | 0.319              | 4.34E-154               |
| NFKBIA                     | 0.301              | 1.67E-34                | UBE2L6               | 0.318              | 1.62E-137               |
| CYBA                       | 0.301              | 5.51E-96                | MT2A                 | 0.309              | 2.71E-52                |
| VCAN                       | 0.301              | 1.36E-110               | BST2                 | 0.309              | 2.66E-119               |
| PADI4                      | 0.300              | 4.36E-104               | OASL                 | 0.303              | *                       |
| CDA                        | 0.299              | 4.77E-78                | LGALS2               | 0.298              | 1.38E-59                |
| DYSF                       | 0.294              | 2.26E-98                | CMPK2                | 0.298              | *                       |
| CXCL8                      | 0.291              | 4.08E-115               | GRN                  | 0.296              | 4.47E-113               |
| SELL                       | 0.288              | 7.20E-76                | PARP9                | 0.292              | 1.40E-174               |
| ELOB                       | 0.287              | 5.91E-90                | SERPINA1             | 0.287              | 1.10E-98                |
| PGD                        | 0.280              | 7.53E-77                | AC020656.1           | 0.285              | 1.74E-73                |
| MCEMP1                     | 0.279              | 1.08E-92                | IFI16                | 0.284              | 5.65E-105               |
| JUNB                       | 0.278              | 1.31E-37                | SP110                | 0.283              | 7.01E-110               |
| PPP1R15A                   | 0.277              | 1.08E-57                | IFI35                | 0.280              | 7.49E-132               |
| HP                         | 0.275              | 4.19E-113               | CTSS                 | 0.279              | 2.97E-164               |
| BLOC1S1                    | 0.273              | 6.44E-58                | MS4A6A               | 0.274              | 1.41E-98                |
| ANPEP                      | 0.272              | 1.19E-66                | SMCHD1               | 0.270              | 7.27E-83                |
| FCER1G                     | 0.271              | 2.59E-66                | APLP2                | 0.266              | 1.18E-92                |
| AC020916.1                 | 0.271              | 1.63E-53                | CFD                  | 0.262              | 3.54E-82                |
| PLEK                       | 0.270              | 9.41E-48                | SNHG5                | 0.254              | 1.09E-75                |
| MAFB                       | 0.268              | 2.02E-11                | SHISA5               | 0.252              | 5.78E-104               |
| S100A11                    | 0.268              | 3.41E-101               |                      |                    |                         |
| ACSL1                      | 0.263              | 2.61E-68                |                      |                    |                         |
| H3F3A                      | 0.259              | 7.67E-97                |                      |                    |                         |
| TRIB1                      | 0.256              | 1.58E-75                |                      |                    |                         |
| TUBA1A                     | 0.253              | 3.42E-30                |                      |                    |                         |

\* Adjusted P-values were smaller than 2E-308

Highly expressed genes in CD14 Mono\_Activated and CD14 Mono\_ISG were determined by DEG analysis in comparison with the CD14<sup>+</sup> monocyte population. Genes that shows 0.25 < Fold change were listed. P-values are calculated using two-sided Wilcoxon Rank Sum test.

## Supplementary Table 6.

### List of genes with altered expression before and after treatment for each case.

|                                        | MPA-1<br>(MPA-MONO) |             |                  | MPA-3<br>(MPA-IFN) |             |                  | MPA-5<br>(MPA-IFN) |             |                  |
|----------------------------------------|---------------------|-------------|------------------|--------------------|-------------|------------------|--------------------|-------------|------------------|
|                                        | Gene Name           | Fold Change | Adjusted P-value | Gene Name          | Fold Change | Adjusted P-value | Gene Name          | Fold Change | Adjusted P-value |
| Upregulated genes<br>After treatment   | IL1R2               | 2.67        | *                | CEBPD              | 1.83        | *                | MT-ATP8            | 1.40        | 3.13E-173        |
|                                        | FKBP5               | 1.44        | *                | RPS2               | 1.67        | *                | RPLP0              | 1.26        | 8.44E-239        |
|                                        | CD163               | 1.43        | *                | CYBA               | 1.58        | *                | RPS3A              | 1.24        | 5.40E-291        |
|                                        | AL137857.1          | 1.20        | *                | S100A9             | 1.47        | *                | RPS4X              | 1.21        | 1.49E-265        |
|                                        | TXNIP               | 1.17        | 4.19E-263        | AL133415.1         | 1.27        | 7.73E-303        | RPS23              | 1.21        | 1.77E-290        |
|                                        | IFITM2              | 1.18        | 4.21E-225        | SMAP2              | 1.27        | *                | RPL32              | 1.21        | 7.41E-282        |
|                                        | AC020656.1          | 1.11        | 2.09E-279        | JUN                | 1.21        | 5.57E-207        | EEF1A1             | 1.18        | 6.49E-291        |
|                                        | DDIT4               | 0.989       | *                | AL137857.1         | 1.16        | *                | RPS13              | 1.17        | 5.67E-273        |
|                                        | CALM2               | 0.979       | *                | TSC22D3            | 1.14        | *                | TXNIP              | 1.17        | 7.69E-179        |
|                                        | HMGB2               | 0.829       | 3.79E-181        | FKBP5              | 1.11        | *                | RPL5               | 1.14        | 3.51E-236        |
| Downregulated genes<br>After treatment | MTRNR2L12           | -2.17       | *                | MTRNR2L12          | -1.94       | *                | MTRNR2L12          | -1.69       | 2.78E-237        |
|                                        | RPL41               | -1.70       | *                | RPL41              | -1.81       | *                | RPL41              | -1.42       | *                |
|                                        | H1FX                | -1.21       | 1.74E-201        | IFI44L             | -0.773      | 5.94E-179        | IFI6               | -1.17       | 3.14E-154        |
|                                        | EGR1                | -1.04       | 5.98E-153        | PCBP2              | -0.735      | 2.15E-187        | SOCS3              | -1.04       | 9.01E-150        |
|                                        | CLU                 | -1.00       | 8.24E-262        | IFITM3             | -0.700      | 9.93E-146        | LY6E               | -0.960      | 3.94E-127        |
|                                        | JUND                | -0.903      | 8.17E-234        | SIGLEC1            | -0.475      | 1.42E-114        | NAMPT              | -0.858      | 9.16E-87         |
|                                        | PLAC8               | -0.867      | 6.61E-163        | CD300E             | -0.399      | 3.72E-48         | PIM3               | -0.742      | 5.15E-99         |
|                                        | BCL2A1              | -0.812      | 1.85E-185        | IFITM1             | -0.399      | 1.96E-50         | ZFP36L1            | -0.739      | 2.05E-52         |
|                                        | NCF1                | -0.806      | 8.50E-164        | MEF2C              | -0.392      | 1.61E-42         | VCAN               | -0.701      | 1.02E-80         |
|                                        | SGK1                | -0.787      | 2.67E-108        | IFI6               | -0.389      | 2.10E-60         | ISG15              | -0.652      | 2.22E-54         |

\* Adjusted P-values were smaller than 2E-308

The top 10 upregulated and downregulated genes in CD14<sup>+</sup> monocytes, comparing pre- and post-treatment conditions in each case. *P*-values are calculated using two-sided Wilcoxon Rank Sum test.

# Supplementary Table 7.

## Characteristics of 43 patients with microscopic polyangiitis recruited for assessing clinical parameters.

| Patient No.          |                                  | 1                          | 2      | 3      | 4    | 5     | 6    | 7      | 8      | 9      | 10    | 11     | 12   | 13   | 14    | 15     | 16     | 17     | 18    | 19     | 20     | 21     | 22     |       |
|----------------------|----------------------------------|----------------------------|--------|--------|------|-------|------|--------|--------|--------|-------|--------|------|------|-------|--------|--------|--------|-------|--------|--------|--------|--------|-------|
| Age                  |                                  | 77                         | 77     | 75     | 70   | 85    | 70   | 77     | 56     | 84     | 70    | 67     | 76   | 57   | 67    | 82     | 71     | 78     | 73    | 82     | 77     | 75     | 72     |       |
| Sex                  |                                  | Female                     | Female | Female | Male | Male  | Male | Female | Female | Female | Male  | Female | Male | Male | Male  | Female | Female | Female | Male  | Female | Female | Female | Male   |       |
| Medication           |                                  | GC                         | None   | GC/AZP | None | None  | None | GC     | None   | GC     | None  | None   | GC   | None | GC    | None   | None   | GC     | None  | GC/AZP | None   | GC     | GC/AZP |       |
| New/Worse/Persistent |                                  | NEW                        | NEW    | PER    | NEW  | NEW   | NEW  | NEW    | NEW    | PER    | NEW   | NEW    | NEW  | PER  | NEW   | NEW    | NEW    | PER    | NEW   | PER    | NEW    | WOR    | WOR    |       |
| Blood Count          | White Blood Cells                | / $\mu$ L                  | 11230  | 7660   | 8160 | 11500 | 4270 | 9810   | 12630  | 6570   | 13240 | 9110   | 5420 | 9630 | 11200 | 16790  | 14570  | 12620  | 10530 | 12420  | 6610   | 12900  | 11970  | 15320 |
|                      | Neutrophils                      | / $\mu$ L                  | 8737   | 5033   | 6144 | 8660  | 2566 | 7308   | 9586   | 4586   | 11757 | 7060   | 3453 | 8773 | 8814  | 14557  | 12720  | 10942  | 7360  | 10097  | 5030   | 10010  | 10941  | 14018 |
|                      | Lymphocytes                      | / $\mu$ L                  | 1853   | 1923   | 1053 | 1553  | 1349 | 1884   | 1806   | 1413   | 1112  | 1203   | 1350 | 510  | 1702  | 1461   | 918    | 934    | 2506  | 1466   | 1249   | 1767   | 634    | 444   |
|                      | Monocytes                        | / $\mu$ L                  | 606    | 360    | 694  | 575   | 282  | 432    | 644    | 388    | 291   | 501    | 331  | 327  | 381   | 688    | 466    | 618    | 600   | 447    | 258    | 516    | 335    | 797   |
|                      | Eosinophils                      | / $\mu$ L                  | 22     | 283    | 220  | 656   | 51   | 147    | 556    | 151    | 13    | 310    | 238  | 10   | 269   | 50     | 423    | 88     | 42    | 373    | 20     | 568    | 24     | 46    |
|                      | Basophils                        | / $\mu$ L                  | 11     | 61     | 49   | 58    | 21   | 39     | 38     | 33     | 66    | 36     | 49   | 10   | 34    | 34     | 44     | 38     | 21    | 37     | 53     | 39     | 36     | 15    |
|                      | Hemoglobin                       | g/dL                       | 9.9    | 11.9   | 13.4 | 12.3  | 12.8 | 12     | 7.4    | 11.1   | 10.2  | 14.1   | 16.2 | 10.3 | 11.5  | 13.1   | 11.1   | 9.2    | 12.7  | 10.9   | 11.4   | 10.7   | 11.4   | 11.2  |
| Platelets            | $\times 10^4$ / $\mu$ L          | 199                        | 441    | 302    | 351  | 192   | 395  | 608    | 370    | 333    | 347   | 233    | 144  | 283  | 284   | 370    | 419    | 206    | 322   | 267    | 580    | 451    | 320    |       |
| Urine                | Occult Blood (Semi-Quantitative) | mg/dL                      | 1      | N.D.   | N.D. | 1     | 0.1  | 0.2    | N.A.   | 0.1    | N.D.  | 0.5    | N.A. | 0.1  | N.A.  | 0.03   | 0.2    | 0.1    | N.A.  | 0.2    | 0.06   | 0.1    | N.A.   | 1     |
|                      | Up/Ucr                           | mg/g Cr                    | 0      | N.A.   | 0.56 | 0.52  | N.A. | N.A.   | N.A.   | 0.54   | N.A.  | 0.24   | N.A. | N.A. | N.A.  | 0.16   | N.A.   | N.A.   | N.A.  | 1.24   | N.A.   | 0.4    | N.A.   | N.A.  |
| Biochemical          | Urea Nitrogen                    | mg/dL                      | 31     | 14     | 28   | 21    | 17   | 18     | N.A.   | 15     | 20    | 14     | 13   | 45   | 12    | 16     | 11     | 16     | 21    | 34     | 15     | 11     | 16     | 28    |
|                      | Creatinine                       | mg/dL                      | 1.38   | 0.52   | 1.42 | 0.79  | 0.77 | 1      | 0.63   | 2.24   | 0.86  | 0.96   | 0.97 | 2.22 | 0.9   | 0.71   | 0.58   | 0.54   | 0.67  | 3.09   | 0.39   | 0.6    | 0.51   | 2.86  |
|                      | eGFR                             | mL/min/1.73 m <sup>2</sup> | 29     | 84.3   | 28.3 | 74.2  | 72.2 | 57.3   | 68.3   | 18.7   | 47.4  | 59.9   | 44.3 | 23.4 | 68.2  | 84.4   | 73.4   | 82.8   | 63.6  | 16.5   | 113.4  | 72.1   | 86.7   | 18    |
|                      | CRP                              | mg/dL                      | 0.22   | 1.02   | 0.43 | 6.63  | 0.07 | 5.9    | 9.34   | 1.77   | 5.01  | 11.04  | 0.61 | 0.06 | 6.49  | 10.47  | 6.93   | 12.84  | <0.04 | 10.68  | 0.98   | 13.13  | 9.8    | 14.51 |
| Immunological        | MPO-ANCA                         | IU/mL                      | 55.6   | 66.4   | 52.2 | 71    | 31.3 | 1690   | 144    | N.A.   | 25.4  | 245    | 308  | 4    | 59.4  | 117    | 36.3   | 27.7   | 68.2  | 32.4   | <1.0   | 267    | N.A.   | 11.5  |
|                      | PR3-ANCA                         | IU/mL                      | <1.0   | 1.4    | N.A. | <1.0  | <1.0 | 1.4    | <1.0   | <1.0   | 2.1   | 2.7    | <1.0 | N.A. | <1.0  | <1.0   | 5.9    | <1.0   | N.A.  | <1.0   | <1.0   | <1.0   | 181    | <1.0  |

  

| Patient No.          |                                  | 23                         | 24    | 25     | 26    | 27     | 28     | 29     | 30     | 31    | 32     | 33    | 34    | 35    | 36     | 37      | 38    | 39     | 40     | 41    | 42     | 43    |      |
|----------------------|----------------------------------|----------------------------|-------|--------|-------|--------|--------|--------|--------|-------|--------|-------|-------|-------|--------|---------|-------|--------|--------|-------|--------|-------|------|
| Age                  |                                  | 64                         | 74    | 84     | 76    | 78     | 81     | 52     | 81     | 66    | 82     | 80    | 62    | 55    | 70     | 75      | 43    | 69     | 79     | 79    | 75     | 80    |      |
| Sex                  |                                  | Male                       | Male  | Female | Male  | Female | Female | Female | Female | Male  | Female | Male  | Male  | Male  | Female | Female  | Male  | Female | Female | Male  | Female | Male  |      |
| Medication           |                                  | GC                         | None  | GC/AZP | GC    | None   | None   | None   | None   | None  | GC     | None  | None  | GC    | GC     | GC/IVCY | None  | None   | None   | None  | None   | None  |      |
| New/Worse/Persistent |                                  | WOR                        | NEW   | WOR    | WOR   | NEW    | NEW    | NEW    | NEW    | NEW   | WOR    | NEW   | NEW   | WOR   | NEW    | PER     | NEW   | NEW    | NEW    | NEW   | NEW    | NEW   |      |
| Blood Count          | White Blood Cells                | / $\mu$ L                  | 14160 | 9650   | 11990 | 9830   | 12840  | 17540  | 8320   | 10470 | 9840   | 11170 | 14040 | 14290 | 8660   | 9520    | 10670 | 7210   | 6670   | 17540 | 10440  | 13110 | 9070 |
|                      | Neutrophils                      | / $\mu$ L                  | 13310 | 8357   | 10887 | 8434   | 11505  | 14102  | 5366   | 8376  | 8738   | 9226  | 12931 | 12361 | 7759   | 8644    | 9720  | 4333   | 5616   | 15348 | 9072   | 11379 | 6095 |
|                      | Lymphocytes                      | / $\mu$ L                  | 609   | 820    | 588   | 649    | 1168   | 2543   | 1473   | 1215  | 846    | 1385  | 505   | 857   | 693    | 609     | 437   | 2278   | 680    | 1245  | 606    | 1468  | 2222 |
|                      | Monocytes                        | / $\mu$ L                  | 227   | 357    | 492   | 678    | 167    | 456    | 291    | 440   | 246    | 559   | 590   | 915   | 199    | 209     | 437   | 490    | 267    | 807   | 355    | 223   | 590  |
|                      | Eosinophils                      | / $\mu$ L                  | 0     | 97     | 12    | 39     | 0      | 386    | 1173   | 408   | 0      | 0     | 0     | 43    | 0      | 10      | 0     | 58     | 100    | 88    | 376    | 13    | 136  |
|                      | Basophils                        | / $\mu$ L                  | 14    | 19     | 12    | 29     | 0      | 53     | 17     | 31    | 10     | 0     | 14    | 114   | 9      | 48      | 75    | 50     | 7      | 53    | 31     | 28    | 27   |
|                      | Hemoglobin                       | g/dL                       | 9.2   | 10.7   | 10.5  | 11.7   | 9.1    | 9.5    | 10.7   | 9.7   | 9.3    | 8.1   | 8.3   | 14.6  | 13.1   | 10.7    | 11.7  | 12.2   | 6.5    | 11.2  | 7.5    | 9.6   | 12.6 |
| Platelets            | $\times 10^4$ / $\mu$ L          | 376                        | 564   | 325    | 203   | 553    | 388    | 376    | 343    | 364   | 444    | 368   | 544   | 365   | 336    | 266     | 270   | 298    | 596    | 359   | 366    | 261   |      |
| Urine                | Occult Blood (Semi-Quantitative) | mg/dL                      | 0.1   | 0.2    | N.A.  | 0.1    | N.D.   | 0.1    | N.A.   | 0.1   | 1      | 0.1   | 0.2   | N.D.  | N.D.   | 0.5     | N.A.  | 0.5    | 0.03   | N.A.  | 0.2    | 0.03  | 0.06 |
|                      | Up/Ucr                           | mg/g Cr                    | N.A.  | 0.44   | N.A.  | 0.13   | N.A.   | 1.06   | N.A.   | 1.23  | N.A.   | 1     | 1.18  | 0.35  | N.A.   | N.A.    | N.A.  | 0.98   | N.A.   | N.A.  | 0.37   | 0.09  | 0.16 |
| Biochemical          | Urea Nitrogen                    | mg/dL                      | 22    | 23     | N.A.  | 26     | 19     | 30     | 7      | 21    | 44     | 30    | 55    | 28    | 10     | 14      | 19    | 37     | 15     | 15    | 14     | 12    | 21   |
|                      | Creatinine                       | mg/dL                      | 0.91  | 1.39   | 0.61  | 1.06   | 0.72   | 2.53   | 0.51   | 1.36  | 0.98   | 1.44  | 2     | 0.85  | 0.78   | 0.56    | 0.54  | 2.45   | 0.67   | 0.66  | 1.11   | 0.54  | 1.18 |
|                      | eGFR                             | mL/min/1.73 m <sup>2</sup> | 65.2  | 39.3   | 69    | 52.5   | 58.8   | 14.7   | 96.4   | 29    | 59.6   | 27.2  | 25.8  | 70.9  | 80.6   | 79.9    | 81.5  | 24.7   | 65.9   | 64.5  | 49.4   | 81.5  | 46   |
|                      | CRP                              | mg/dL                      | 1.64  | 6.32   | 4.54  | N.A.   | 4.79   | 14.29  | 3.89   | 6.95  | 3.86   | 1.74  | 3.21  | 12.78 | 3.27   | 3.42    | <0.04 | <0.04  | 8.92   | 16.48 | 13.44  | 7.87  | 4.04 |
| Immunological        | MPO-ANCA                         | IU/mL                      | 52.8  | 2900   | <1.0  | 162    | 270    | 311    | 261    | 60.8  | 832    | 140   | 201   | 22.7  | 7      | 5.4     | <1.0  | 1130   | 17.2   | 226   | 1730   | 76.5  | 22   |
|                      | PR3-ANCA                         | IU/mL                      | <1.0  | N.A.   | N.A.  | N.A.   | <1.0   | 3.4    | N.A.   | <1.0  | <1.0   | <1.0  | <1.0  | <1.0  | N.A.   | <1.0    | <1.0  | <1.0   | <1.0   | 2.2   | <1.0   | <1.0  | <1.0 |

MPA; Microscopic polyangiitis, GC; Glucocorticoids, AZP; Azathioprine, IVCY; Intravenous cyclophosphamide, WOR; Worse, PER; Persistent, Up/Ucr; Urine protein/urine creatinine ratio, eGFR; Estimated glomerular filtration rate, CRP; C-reactive protein, MPO; Myeloperoxidase, PR3; Proteinase 3, ANCA; Anti-neutrophil cytoplasmic antibody. The table includes MPO-ANCA and PR3-ANCA levels if they were measured within one month prior to the date of blood collection, and there was no change in treatment during that period. N.A.; Not assessed, N.D.; Not detected.



**Supplementary Table 8.**

**Correlation between the percentage of monocytes and representative clinical parameters, and between serum IFN- $\alpha$  concentrations and representative clinical parameters.**

|               |                                     |                            | v.s. Monocyte Ratio<br>(% of PBMC) |          | v.s. Serum IFN- $\alpha$<br>(pg/mL) |       |
|---------------|-------------------------------------|----------------------------|------------------------------------|----------|-------------------------------------|-------|
|               |                                     |                            | R                                  | P        | R                                   | P     |
| Blood Count   | White Blood Cells                   | / $\mu$ L                  | 0.30                               | 0.0083   | -0.11                               | 0.36  |
|               | Neutrophils                         | / $\mu$ L                  | 0.34                               | 0.0031   | -0.16                               | 0.17  |
|               | Lymphocytes                         | / $\mu$ L                  | -0.50                              | 0.000014 | 0.22                                | 0.059 |
|               | Monocytes                           | / $\mu$ L                  | 0.41                               | 0.00037  | 0.035                               | 0.76  |
|               | Eosinophils                         | / $\mu$ L                  | -0.13                              | 0.27     | 0.21                                | 0.063 |
|               | Basophils                           | / $\mu$ L                  | -0.039                             | 0.73     | 0.13                                | 0.25  |
|               | Hemoglobin                          | g/dL                       | -0.054                             | 0.64     | -0.14                               | 0.24  |
|               | Platelets                           | $\times 10^4$ / $\mu$ L    | 0.042                              | 0.71     | 0.23                                | 0.049 |
| Urine         | Occult Blood<br>(Semi-Quantitative) | mg/dL                      | 0.19                               | 0.15     | 0.092                               | 0.49  |
|               | Up/Ucr                              | mg/g Cr                    | -0.073                             | 0.60     | 0.36                                | 0.011 |
| Biochemical   | Urea Nitrogen                       | mg/dL                      | 0.17                               | 0.16     | -0.011                              | 0.93  |
|               | Creatinine                          | mg/dL                      | 0.033                              | 0.77     | -0.075                              | 0.52  |
|               | eGFR                                | mL/min/1.73 m <sup>2</sup> | -0.024                             | 0.83     | 0.032                               | 0.79  |
|               | CRP                                 | mg/dL                      | 0.30                               | 0.0089   | -0.052                              | 0.67  |
| Immunological | MPO-ANCA                            | IU/mL                      | -0.17                              | 0.15     | 0.28                                | 0.020 |
|               | PR3-ANCA                            | IU/mL                      | 0.15                               | 0.43     | -0.087                              | 0.68  |

Up/Ucr; Urine protein/urine creatinine ratio, eGFR; Estimated glomerular filtration rate, CRP; C-reactive protein, MPO; Myeloperoxidase, PR3; Proteinase 3, ANCA; Anti-neutrophil cytoplasmic antibody. Correlations and *P*-values were quantified using Kendall's correlation coefficient (R).

**Supplementary Table 9.**  
**List of Total-seq C antibodies for CITE-seq.**

| Target        | Antibody                                               | Catalog Number | Final conc. (ng/mL) |
|---------------|--------------------------------------------------------|----------------|---------------------|
| CD3           | TotalSeq™-C0034 anti-human CD3 Antibody                | 300479         | 500                 |
| CD4           | TotalSeq™-C0072 anti-human CD4 Antibody                | 300567         | 31                  |
| CD8a          | TotalSeq™-C0080 anti-human CD8a Antibody               | 301071         | 16                  |
| CD11b         | TotalSeq™-C0161 anti-human CD11b Antibody              | 301359         | 31                  |
| CD14          | TotalSeq™-C0081 anti-human CD14 Antibody               | 301859         | 250                 |
| CD16          | TotalSeq™-C0083 anti-human CD16 Antibody               | 302065         | 63                  |
| CD19          | TotalSeq™-C0050 anti-human CD19 Antibody               | 302265         | 125                 |
| CD20          | TotalSeq™-C0100 anti-human CD20 Antibody               | 302363         | 125                 |
| CD25          | TotalSeq™-C0085 anti-human CD25 Antibody               | 302649         | 500                 |
| CD27          | TotalSeq™-C0154 anti-human CD27 Antibody               | 302853         | 250                 |
| CD28          | TotalSeq™-C0386 anti-human CD28 Antibody               | 302963         | 1500                |
| CD38          | TotalSeq™-C0389 anti-human CD38 Antibody               | 303543         | 4000                |
| CD45          | TotalSeq™-C0391 anti-human CD45 Antibody               | 304068         | 63                  |
| CD45RA        | TotalSeq™-C0063 anti-human CD45RA Antibody             | 304163         | 16                  |
| CD45RO        | TotalSeq™-C0087 anti-human CD45RO Antibody             | 304259         | 4000                |
| CD123         | TotalSeq™-C0064 anti-human CD123 Antibody              | 306045         | 500                 |
| HLA-DR        | TotalSeq™-C0159 anti-human HLA-DR Antibody             | 307663         | 500                 |
| CD117         | TotalSeq™-C0061 anti-human CD117 (c-kit) Antibody      | 313243         | 500                 |
| CD206         | TotalSeq™-C0205 anti-human CD206 (MMR) Antibody        | 321147         | 1500                |
| FcεR1α        | TotalSeq™-C0352 anti-human FcεR1α Antibody             | 334645         | 1000                |
| CD161         | TotalSeq™-C0149 anti-human CD161 Antibody              | 339947         | 31                  |
| IgD           | TotalSeq™-C0384 anti-human IgD Antibody                | 348245         | 188                 |
| CD294(CRTH2)  | TotalSeq™-C0102 anti-human CD294 (CRTH2) Antibody      | 350131         | 500                 |
| CD127(IL-7Rα) | TotalSeq™-C0390 anti-human CD127 (IL-7Rα) Antibody     | 351356         | 250                 |
| CD197(CCR7)   | TotalSeq™-C0148 anti-human CD197 (CCR7) Antibody       | 353251         | 250                 |
| CD196(CCR6)   | TotalSeq™-C0143 anti-human CD196 (CCR6) Antibody       | 353440         | 500                 |
| CD183(CXCR3)  | TotalSeq™-C0140 anti-human CD183 (CXCR3) Antibody      | 353747         | 1000                |
| CD185(CXCR5)  | TotalSeq™-C0144 anti-human CD185 (CXCR5) Antibody      | 356939         | 500                 |
| CD194(CCR4)   | TotalSeq™-C0071 anti-human CD194 (CCR4) Antibody       | 359425         | 500                 |
| CD56(NCAM)    | TotalSeq™-C0047 anti-human CD56 (NCAM) Antibody        | 362559         | 1000                |
| CD33          | TotalSeq™-C0052 anti-human CD33 Antibody               | 366633         | 16                  |
| CD11c         | TotalSeq™-C0053 anti-human CD11c Antibody              | 371521         | 16                  |
| CD66b         | TotalSeq™-C0166 anti-human CD66b Antibody              | 392909         | 250                 |
| CD45R(B220)   | TotalSeq™-C0103 anti-mouse/human CD45R/B220 Antibody   | 103273         | 1000                |
| CD138         | TotalSeq™-C0055 anti-human CD138 (Syndecan-1) Antibody | 356539         | 1000                |
| CD5           | TotalSeq™-C0138 anti-human CD5 Antibody                | 300637         | 250                 |
| CD10          | TotalSeq™-C0062 anti-human CD10 Antibody               | 312233         | 500                 |
| CD24          | TotalSeq™-C0180 anti-human CD24 Antibody               | 311143         | 125                 |
| CD80          | TotalSeq™-C0005 anti-human CD80 Antibody               | 305243         | 1000                |
| IgM           | TotalSeq™-C0136 anti-human IgM Antibody                | 314547         | 125                 |
| IgG           | TotalSeq™-C0375 anti-human IgG Fc Antibody             | 410727         | 250                 |
| CD21          | TotalSeq™-C0181 anti-human CD21 Antibody               | 354923         | 63                  |
| PD-1          | TotalSeq™-C0088 anti-human CD279 (PD-1) Antibody       | 329963         | 250                 |

**Supplementary Table 10.**  
**Sequence information of each study participant.**

| Sequence ID | Study participant | Treatment        | Estimated Number of Cells | Mean Reads per Cell | Median Genes per Cell | Number of Reads | Valid Barcodes | Sequencing Saturation | Q30 Bases in Barcode | Q30 Bases in RNA Read | Q30 Bases in UMI | Reads Mapped to Genome |
|-------------|-------------------|------------------|---------------------------|---------------------|-----------------------|-----------------|----------------|-----------------------|----------------------|-----------------------|------------------|------------------------|
| 1           | MPA-1             | Before treatment | 7,635                     | 45,164              | 1,563                 | 352,459,721     | 92.10%         | 73.90%                | 95.30%               | 87.60%                | 94.50%           | 88.00%                 |
| 2           | MPA-1             | After treatment  | 4,466                     | 69,880              | 1,696                 | 312,083,501     | 93.10%         | 84.80%                | 94.50%               | 88.30%                | 93.70%           | 88.30%                 |
| 3           | MPA-2             | Before treatment | 4,167                     | 75,412              | 1,094                 | 314,243,177     | 90.60%         | 81.30%                | 96.60%               | 90.70%                | 96.40%           | 85.00%                 |
| 4           | MPA-3             | Before treatment | 6,588                     | 46,018              | 1,415                 | 303,170,946     | 92.20%         | 83.10%                | 95.10%               | 93.50%                | 94.50%           | 94.20%                 |
| 5           | MPA-3             | After treatment  | 6,893                     | 57,207              | 1,678                 | 394,327,325     | 93.20%         | 82.40%                | 94.40%               | 88.60%                | 92.70%           | 93.50%                 |
| 6           | MPA-4             | Before treatment | 8,076                     | 79,116              | 1,744                 | 638,940,819     | 91.00%         | 81.70%                | 96.00%               | 89.00%                | 95.60%           | 85.60%                 |
| 7           | MPA-5             | Before treatment | 6,872                     | 53,547              | 1,570                 | 367,975,449     | 91.60%         | 78.40%                | 94.50%               | 88.40%                | 93.70%           | 87.50%                 |
| 8           | MPA-5             | After treatment  | 5,811                     | 55,344              | 1,870                 | 321,605,303     | 91.90%         | 77.90%                | 94.60%               | 88.60%                | 93.80%           | 92.50%                 |
| 9           | MPA-6             | Before treatment | 15,960                    | 20,568              | 1,272                 | 328,266,244     | 92.30%         | 55.50%                | 95.60%               | 87.00%                | 94.60%           | 86.70%                 |
| 10          | MPA-7             | Before treatment | 8,029                     | 32,427              | 1,611                 | 260,355,275     | 90.00%         | 72.00%                | 92.30%               | 91.10%                | 91.90%           | 94.60%                 |
| 11          | MPA-8             | Before treatment | 10,502                    | 22,590              | 1,657                 | 237,241,645     | 90.90%         | 63.60%                | 92.10%               | 90.20%                | 91.60%           | 93.30%                 |
| 12          | HD-1              | Non              | 4,009                     | 74,239              | 956                   | 297,622,289     | 87.30%         | 63.80%                | 92.70%               | 90.60%                | 92.00%           | 92.60%                 |
| 13          | HD-2              | Non              | 9,958                     | 28,992              | 1,647                 | 288,701,833     | 88.10%         | 63.90%                | 92.90%               | 91.00%                | 92.30%           | 93.60%                 |
| 14          | HD-3              | Non              | 5,589                     | 59,355              | 1,095                 | 331,732,486     | 90.40%         | 75.80%                | 94.80%               | 90.80%                | 94.20%           | 91.40%                 |
| 15          | HD-4              | Non              | 9,007                     | 34,896              | 1,391                 | 314,309,187     | 92.40%         | 79.80%                | 94.80%               | 90.50%                | 94.20%           | 89.00%                 |
| 16          | HD-5              | Non              | 6,276                     | 57,835              | 1,916                 | 362,973,245     | 90.30%         | 80.60%                | 94.90%               | 91.10%                | 94.30%           | 92.40%                 |
| 17          | HD-6              | Non              | 10,761                    | 34,569              | 1,785                 | 371,999,724     | 90.70%         | 69.80%                | 94.60%               | 90.20%                | 94.10%           | 89.40%                 |
| 18          | HD-7              | Non              | 4,362                     | 69,244              | 1,399                 | 302,040,906     | 91.70%         | 81.40%                | 94.70%               | 88.80%                | 94.10%           | 83.50%                 |

| Sequence ID | Reads Mapped Confidently to Genome | Reads Mapped Confidently to Intergenic Regions | Reads Mapped Confidently to Intronic Regions | Reads Mapped Confidently to Exonic Regions | Reads Mapped Confidently to Transcriptome | Reads Mapped Antisense to Gene | Fraction Reads in Cells | Total Genes Detected | Median UMI Counts per Cell | Antibody: Number of Reads | Antibody: Mean Reads per Cell | Antibody: Valid Barcodes |
|-------------|------------------------------------|------------------------------------------------|----------------------------------------------|--------------------------------------------|-------------------------------------------|--------------------------------|-------------------------|----------------------|----------------------------|---------------------------|-------------------------------|--------------------------|
| 1           | 65.80%                             | 3.20%                                          | 9.80%                                        | 52.80%                                     | 48.00%                                    | 3.40%                          | 87.60%                  | 22,656               | 4,074                      | 751,441,298               | 98.421                        | 98.10%                   |
| 2           | 76.20%                             | 3.40%                                          | 8.20%                                        | 64.60%                                     | 60.50%                                    | 2.70%                          | 84.10%                  | 21,537               | 4,654                      | 581,408,890               | 130,186                       | 97.20%                   |
| 3           | 53.00%                             | 2.40%                                          | 4.30%                                        | 46.30%                                     | 42.50%                                    | 2.70%                          | 90.80%                  | 20,796               | 4,888                      | 591,597,028               | 141,971                       | 97.60%                   |
| 4           | 83.90%                             | 5.10%                                          | 11.20%                                       | 67.60%                                     | 62.90%                                    | 2.90%                          | 82.00%                  | 21,283               | 3,606                      | 790,151,007               | 119,937                       | 98.10%                   |
| 5           | 75.50%                             | 3.20%                                          | 8.10%                                        | 64.20%                                     | 60.30%                                    | 2.60%                          | 89.20%                  | 22,074               | 4,807                      | 909,102,101               | 131,888                       | 97.80%                   |
| 6           | 64.00%                             | 3.40%                                          | 9.80%                                        | 50.80%                                     | 46.40%                                    | 3.00%                          | 81.40%                  | 23,859               | 4,662                      | 932,748,274               | 115,496                       | 98.10%                   |
| 7           | 66.60%                             | 4.10%                                          | 11.00%                                       | 51.60%                                     | 47.80%                                    | 2.30%                          | 83.00%                  | 22,462               | 3,914                      | 673,807,973               | 98,051                        | 97.40%                   |
| 8           | 69.20%                             | 3.60%                                          | 7.20%                                        | 58.40%                                     | 54.20%                                    | 2.70%                          | 87.70%                  | 21,939               | 5,007                      | 638,692,510               | 109,911                       | 97.60%                   |
| 9           | 67.10%                             | 3.90%                                          | 13.70%                                       | 49.60%                                     | 44.80%                                    | 3.30%                          | 89.00%                  | 23,368               | 2,860                      | 560,026,115               | 95,089                        | 98.20%                   |
| 10          | 76.50%                             | 4.60%                                          | 8.30%                                        | 63.70%                                     | 57.50%                                    | 4.60%                          | 94.30%                  | 22,768               | 4,329                      | 672,938,811               | 83,814                        | 97.90%                   |
| 11          | 80.00%                             | 4.30%                                          | 8.10%                                        | 67.60%                                     | 61.20%                                    | 4.60%                          | 94.60%                  | 23,316               | 3,956                      | 723,982,392               | 68,938                        | 97.90%                   |
| 12          | 59.30%                             | 7.20%                                          | 12.80%                                       | 39.30%                                     | 31.20%                                    | 6.80%                          | 32.20%                  | 20,760               | 1,688                      | 503,881,842               | 125,688                       | 97.90%                   |
| 13          | 73.80%                             | 4.90%                                          | 10.20%                                       | 58.70%                                     | 51.20%                                    | 5.80%                          | 88.80%                  | 23,434               | 4,152                      | 707,978,067               | 71,096                        | 97.90%                   |
| 14          | 75.60%                             | 5.30%                                          | 10.30%                                       | 60.10%                                     | 53.40%                                    | 5.00%                          | 44.30%                  | 21,338               | 2,243                      | 577,647,526               | 103,354                       | 97.80%                   |
| 15          | 77.50%                             | 3.80%                                          | 8.70%                                        | 65.00%                                     | 59.60%                                    | 3.70%                          | 93.20%                  | 22,693               | 3,276                      | 604,413,016               | 67,105                        | 97.80%                   |
| 16          | 76.90%                             | 4.10%                                          | 10.80%                                       | 62.00%                                     | 56.40%                                    | 3.90%                          | 92.90%                  | 23,036               | 5,205                      | 522,133,217               | 83,195                        | 98.00%                   |
| 17          | 74.10%                             | 4.10%                                          | 10.60%                                       | 59.40%                                     | 53.90%                                    | 3.90%                          | 93.00%                  | 23,482               | 4,505                      | 660,489,281               | 61,378                        | 98.00%                   |
| 18          | 66.80%                             | 5.20%                                          | 15.10%                                       | 46.60%                                     | 42.90%                                    | 2.20%                          | 81.00%                  | 21,830               | 3,294                      | 496,141,355               | 113,742                       | 97.80%                   |

| Sequence ID | Antibody: Sequencing Saturation | Antibody: Q30 Bases in Barcode | Antibody: Q30 Bases in Antibody Read | Antibody: Q30 Bases in UMI | Antibody: Fraction Antibody Reads | Antibody: Fraction Antibody Reads Usable | Antibody: Fraction Antibody Reads Usable per Cell | Antibody: Fraction Antibody Reads in Aggregate Barcodes | Antibody: Fraction Unrecognized Antibody | Antibody: Fraction Antibody Reads in Cells | Antibody: Median UMIs per Cell |
|-------------|---------------------------------|--------------------------------|--------------------------------------|----------------------------|-----------------------------------|------------------------------------------|---------------------------------------------------|---------------------------------------------------------|------------------------------------------|--------------------------------------------|--------------------------------|
| 1           | 84.30%                          | 95.60%                         | 95.40%                               | 94.40%                     | 95.80%                            | 31.90%                                   | 31.407                                            | 1.70%                                                   | 4.20%                                    | 34.00%                                     | 4.223                          |
| 2           | 85.70%                          | 97.70%                         | 0.00%                                | 97.50%                     | 94.00%                            | 15.90%                                   | 20,715                                            | 3.40%                                                   | 6.00%                                    | 17.30%                                     | 2.625                          |
| 3           | 87.60%                          | 97.20%                         | 96.80%                               | 96.50%                     | 96.00%                            | 17.10%                                   | 24,209                                            | 3.00%                                                   | 4.00%                                    | 18.20%                                     | 2.138                          |
| 4           | 88.00%                          | 96.10%                         | 79.50%                               | 95.20%                     | 96.10%                            | 18.90%                                   | 22,694                                            | 6.90%                                                   | 3.90%                                    | 20.40%                                     | 2.074                          |
| 5           | 97.60%                          | 0.00%                          | 83.50%                               | 97.40%                     | 95.60%                            | 19.20%                                   | 25,342                                            | 31.50%                                                  | 4.40%                                    | 20.50%                                     | 3.127                          |
| 6           | 73.30%                          | 97.10%                         | 96.30%                               | 96.20%                     | 95.70%                            | 23.60%                                   | 27,213                                            | 3.70%                                                   | 4.30%                                    | 25.30%                                     | 4.956                          |
| 7           | 90.60%                          | 97.80%                         | 83.20%                               | 97.50%                     | 92.90%                            | 29.70%                                   | 29,119                                            | 2.90%                                                   | 7.10%                                    | 32.70%                                     | 2.291                          |
| 8           | 91.70%                          | 97.80%                         | 82.30%                               | 97.30%                     | 92.70%                            | 24.60%                                   | 26,989                                            | 4.00%                                                   | 7.30%                                    | 27.10%                                     | 2.048                          |
| 9           | 74.40%                          | 95.70%                         | 95.50%                               | 94.70%                     | 95.90%                            | 45.90%                                   | 16,093                                            | 3.00%                                                   | 4.10%                                    | 48.90%                                     | 3.310                          |
| 10          | 77.30%                          | 95.60%                         | 73.80%                               | 94.50%                     | 95.80%                            | 20.60%                                   | 17,255                                            | 7.80%                                                   | 4.20%                                    | 22.10%                                     | 3.144                          |
| 11          | 83.70%                          | 95.60%                         | 74.10%                               | 94.60%                     | 95.20%                            | 35.30%                                   | 24,361                                            | 2.50%                                                   | 4.80%                                    | 38.00%                                     | 3.242                          |
| 12          | 88.90%                          | 95.30%                         | 79.20%                               | 94.00%                     | 95.50%                            | 13.40%                                   | 16,890                                            | 1.30%                                                   | 4.50%                                    | 14.40%                                     | 1.536                          |
| 13          | 84.40%                          | 95.40%                         | 79.60%                               | 94.00%                     | 95.60%                            | 28.70%                                   | 20,399                                            | 1.40%                                                   | 4.40%                                    | 30.70%                                     | 2.350                          |
| 14          | 61.20%                          | 95.70%                         | 67.00%                               | 94.70%                     | 95.30%                            | 8.80%                                    | 9,069                                             | 1.80%                                                   | 4.70%                                    | 9.40%                                      | 3.212                          |
| 15          | 52.40%                          | 95.80%                         | 68.30%                               | 94.80%                     | 95.40%                            | 13.90%                                   | 9,344                                             | 1.20%                                                   | 4.60%                                    | 15.00%                                     | 4.080                          |
| 16          | 46.40%                          | 96.00%                         | 69.30%                               | 95.00%                     | 95.70%                            | 11.10%                                   | 9,221                                             | 0.30%                                                   | 4.30%                                    | 11.80%                                     | 4.506                          |
| 17          | 58.80%                          | 95.90%                         | 68.50%                               | 94.80%                     | 95.60%                            | 19.30%                                   | 11,823                                            | 1.40%                                                   | 4.40%                                    | 20.60%                                     | 4.419                          |
| 18          | 46.90%                          | 95.90%                         | 69.50%                               | 94.80%                     | 95.60%                            | 8.30%                                    | 9,389                                             | 2.40%                                                   | 4.40%                                    | 8.90%                                      | 4.172                          |

**Supplementary Table 11.**  
**List of heavy metal-conjugated antibodies for CyTOF.**

**PBMC mapping**

| Target | Clone    | Label | Kit                           |
|--------|----------|-------|-------------------------------|
| CD19   | HIB19    | 142Nd | Direct Immune Profiling Assay |
| CD4    | RPA-T4   | 145Nd | Direct Immune Profiling Assay |
| CD8a   | RPA-T8   | 146Nd | Direct Immune Profiling Assay |
| CD11c  | Bu15     | 147Sm | Direct Immune Profiling Assay |
| CD16   | 3G8      | 148Nd | Direct Immune Profiling Assay |
| CD25   | 2A3      | 149Sm | Direct Immune Profiling Assay |
| MP1β   | D21-1351 | 150Nd | Direct Immune Profiling Assay |
| CD123  | 6H6      | 151Eu | Direct Immune Profiling Assay |
| CD45   | HI30     | 154Sm | Direct Immune Profiling Assay |
| CD14   | M5E2     | 160Gd | Direct Immune Profiling Assay |
| CD69   | FN50     | 162Dy | Direct Immune Profiling Assay |
| Foxp3  | 259D/C7  | 163Dy | Direct Immune Profiling Assay |
| CD161  | HP3G10   | 164Dy | Direct Immune Profiling Assay |
| CD45RO | UCHL1    | 165Ho | Direct Immune Profiling Assay |
| CD27   | O323     | 167Er | Direct Immune Profiling Assay |
| CD45RA | HI100    | 169Tm | Direct Immune Profiling Assay |
| CD3    | UCHT1    | 170Er | Direct Immune Profiling Assay |
| CD57   | HCD57    | 172Yb | Direct Immune Profiling Assay |
| CD127  | A019D5   | 176Yb | Direct Immune Profiling Assay |

**CD8 T cell mapping**

| Target     | Clone     | Label | Kit                                  |
|------------|-----------|-------|--------------------------------------|
| CD19       | HIB19     | 142Nd | Human PB Phenotyping panel           |
| IL-5       | TRFK5     | 143Nd | Human Intracellular Cytokine I Panel |
| IL-4       | MP4-25D2  | 144Nd | Human Intracellular Cytokine I Panel |
| CD4        | RPA-T4    | 145Nd | Human T-Cell Phenotyping panel       |
| CD8a       | RPA-T8    | 146Nd | Human T-Cell Phenotyping panel       |
| CD11c      | Bu15      | 147Sm | Human PB Phenotyping panel           |
| CD16       | 3G8       | 148Nd | Human T-Cell Phenotyping panel       |
| CD25       | 2A3       | 149Sm | Human T-Cell Phenotyping panel       |
| MP1β       | D21-1351  | 150Nd | Human Intracellular Cytokine I Panel |
| CD123      | 6H6       | 151Eu | Human PB Phenotyping panel           |
| TNFα       | Mab11     | 152Sm | Human Intracellular Cytokine I Panel |
| CD45       | HI30      | 154Sm | Human T-Cell Phenotyping panel       |
| IFN-α2b    | 7N4-1     | 155Gd | Human Intracellular Cytokine I Panel |
| IL-6       | MQ2-13A5  | 156Gd | Human Intracellular Cytokine I Panel |
| IL-2       | MQ1-17H12 | 158Gd | Human Intracellular Cytokine I Panel |
| GM-CSF     | BVD221C11 | 159Tb | Human Intracellular Cytokine I Panel |
| CD14       | M5E2      | 160Gd | Human PB Phenotyping panel           |
| IL-17A     | BL168     | 161Dy | Human Intracellular Cytokine I Panel |
| CD69       | FN50      | 162Dy | Human T-Cell Phenotyping panel       |
| Foxp3      | 259D/C7   | 163Dy | Human T-Cell Phenotyping panel       |
| CD161      | HP3G10    | 164Dy | Human PB Phenotyping panel           |
| CD45RO     | UCHL1     | 165Ho | Human T-Cell Phenotyping panel       |
| IL-10      | JES39D7   | 166Er | Human Intracellular Cytokine I Panel |
| CD27       | O323      | 167Er | Human PB Phenotyping panel           |
| IFN-γ      | B27       | 168Er | Human Intracellular Cytokine I Panel |
| CD45RA     | HI100     | 169Tm | Human T-Cell Phenotyping panel       |
| CD3        | UCHT1     | 170Er | Human T-Cell Phenotyping panel       |
| Granzyme B | GB11      | 171Yb | Human Intracellular Cytokine I Panel |
| CD57       | HCD57     | 172Yb | Human T-Cell Phenotyping panel       |
| HLA-DR     | L243      | 174Yb | Human T-Cell Phenotyping panel       |
| Perforin   | B-D48     | 175Lu | Human Intracellular Cytokine I Panel |
| CD127      | A019D5    | 176Yb | Human T-Cell Phenotyping panel       |

**Monocyte mapping**

| Target      | Clone    | Label | Kit                           |
|-------------|----------|-------|-------------------------------|
| CD196/CCR6  | 9C4      | 141Pr | Direct Immune Profiling Assay |
| CD123/IL-3R | 6H6      | 143Nd | Direct Immune Profiling Assay |
| CD19        | HIB19    | 144Nd | Direct Immune Profiling Assay |
| CD4         | RPA-T4   | 145Nd | Direct Immune Profiling Assay |
| CD8a        | RPA-T8   | 146Nd | Direct Immune Profiling Assay |
| CD11c       | Bu15     | 147Sm | Direct Immune Profiling Assay |
| CD16        | 3G8      | 148Nd | Direct Immune Profiling Assay |
| CD45RO      | UCHL1    | 149Sm | Direct Immune Profiling Assay |
| CD45RA      | HI100    | 150Nd | Direct Immune Profiling Assay |
| CD161       | HP-3G10  | 151Eu | Direct Immune Profiling Assay |
| CD194/CCR4  | L291H4   | 152Sm | Direct Immune Profiling Assay |
| CD25        | BC96     | 153Eu | Direct Immune Profiling Assay |
| CD27        | O323     | 154Sm | Direct Immune Profiling Assay |
| CD57        | HCD57    | 155Gd | Direct Immune Profiling Assay |
| CD183/CXCR3 | G025H7   | 156Gd | Direct Immune Profiling Assay |
| CD185/CXCR5 | J252D4   | 158Gd | Direct Immune Profiling Assay |
| CD206       | 15-2     | 159Tb | Direct Immune Profiling Assay |
| CD28        | CD28.2   | 160Gd | Direct Immune Profiling Assay |
| CD38        | HB-7     | 161Dy | Direct Immune Profiling Assay |
| CD117       | 104D2    | 162Dy | Direct Immune Profiling Assay |
| CD56/NCAM   | NCAM16.2 | 163Dy | Direct Immune Profiling Assay |
| TCRgd       | B1       | 164Dy | Direct Immune Profiling Assay |
| FCεR1α      | AER-37   | 165Ho | Direct Immune Profiling Assay |
| CD294       | BM16     | 166Er | Direct Immune Profiling Assay |
| CD197/CCR7  | G043H7   | 167Er | Direct Immune Profiling Assay |
| CD14        | 63D3     | 168Er | Direct Immune Profiling Assay |
| CD33        | WM53     | 169Tm | Direct Immune Profiling Assay |
| CD3         | UCHT1    | 170Er | Direct Immune Profiling Assay |
| CD20        | 2H7      | 171Yb | Direct Immune Profiling Assay |
| CD66b       | G10F5    | 172Yb | Direct Immune Profiling Assay |
| HLA-DR      | LN3      | 173Yb | Direct Immune Profiling Assay |
| IgD         | IA6-2    | 174Yb | Direct Immune Profiling Assay |
| CD127       | A019D5   | 176Yb | Direct Immune Profiling Assay |
| CD11b       | ICRF44   | 209Bi | Direct Immune Profiling Assay |

**Supplementary Fig. 1. UMAP plots of PBMCs derived from each study participant.**

**a**

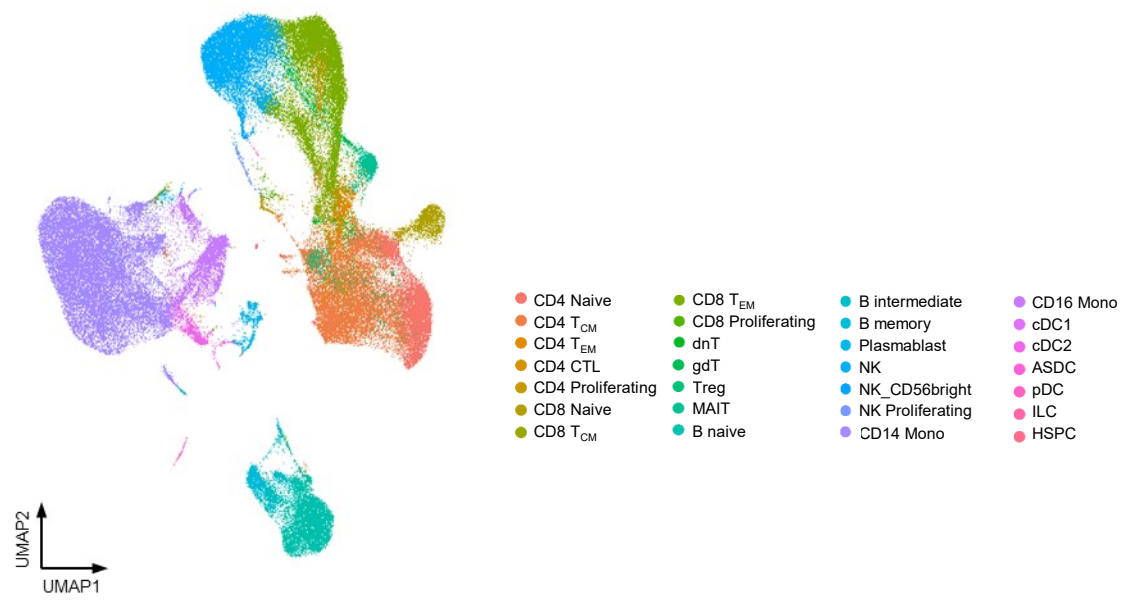

**b**

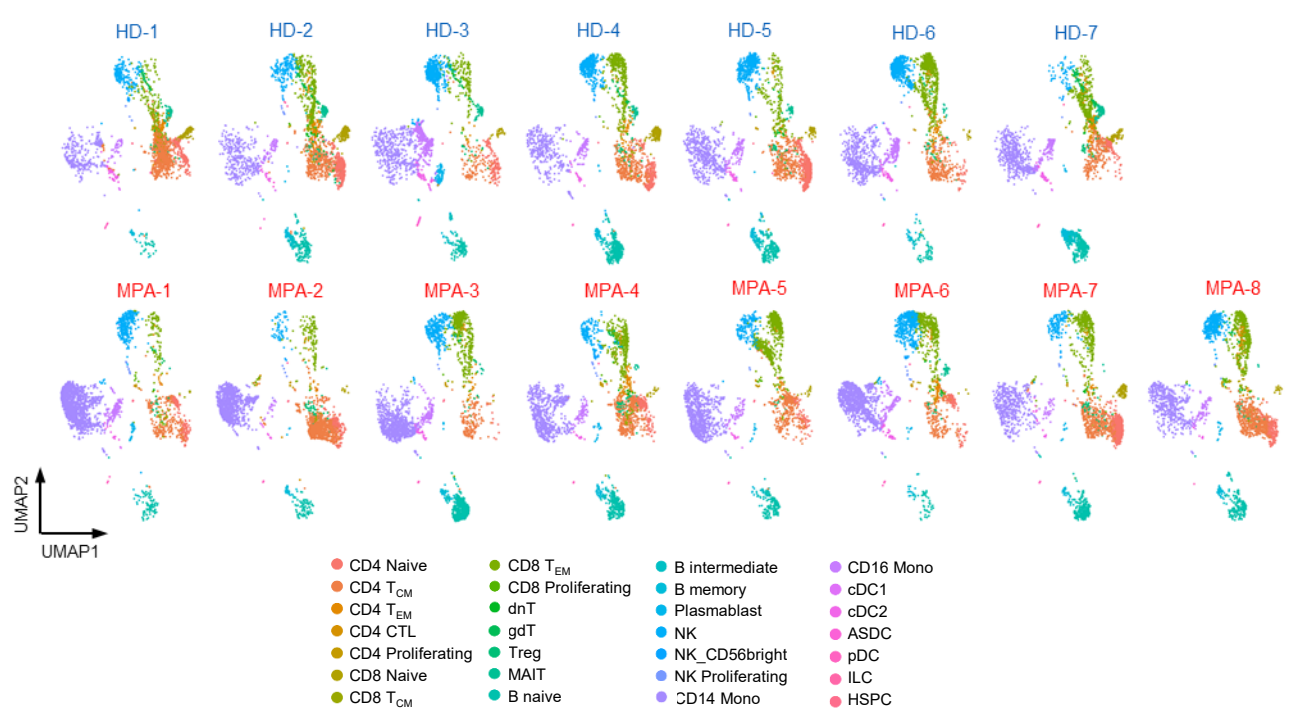

**(a)** UMAP plots showing CITE-seq data of 109,350 PBMCs derived from 15 total participants including healthy donors (n = 7) and patients with MPA (n = 8). Each cellular cluster was annotated with reference mapping. **(b)** Individual UMAP plots of PBMCs derived from each study participant.

## Supplementary Fig. 2. CyTOF analysis of PBMCs derived from each study participant.

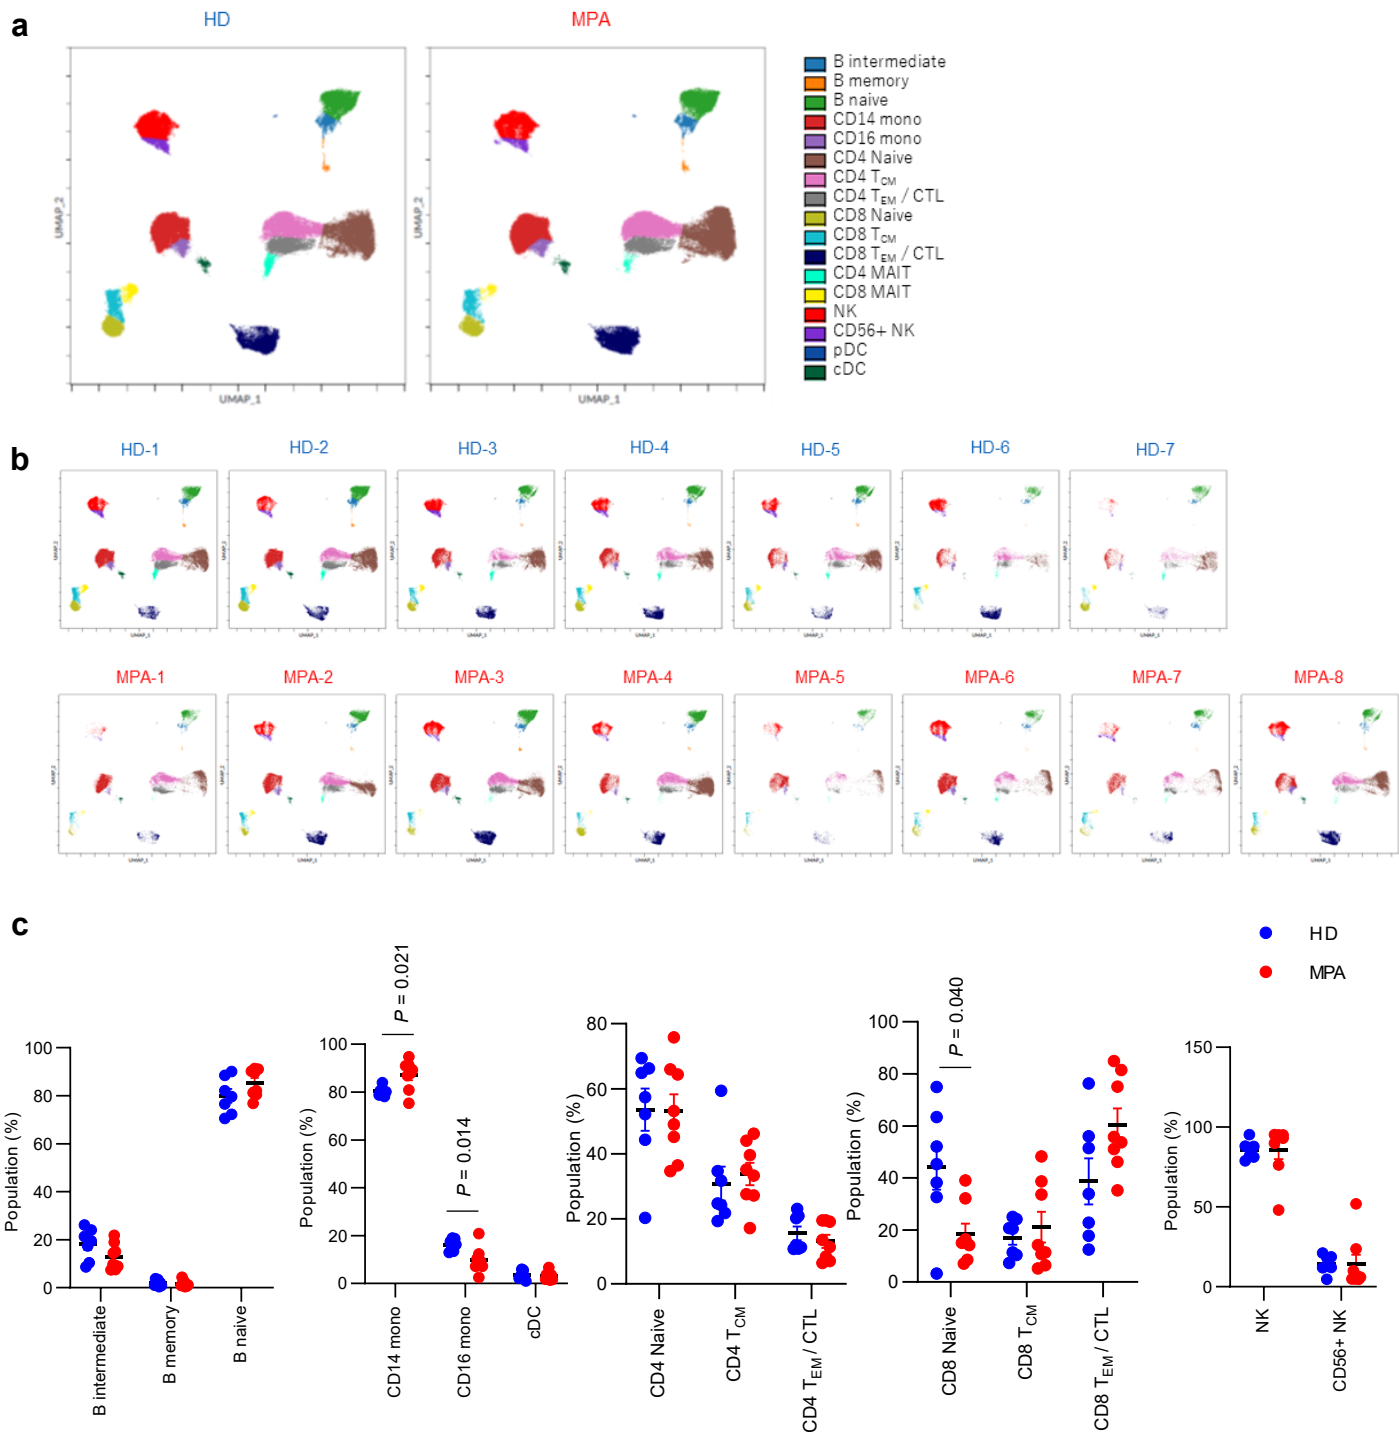

**(a)** UMAP plots showing CITE-seq data of 737,794 PBMCs derived from healthy donors ( $n = 7$ ) and patients with MPA ( $n = 8$ ). Each cellular cluster was manually annotated based on surface marker expression. The color-coded columns indicate cell types. **(b)** Individual UMAP plots of PBMCs derived from each study participant. Each cellular cluster was manually annotated based on surface marker expression. **(c)** Percentage of each cellular subpopulation relative to the total number of PBMCs. Blue dots indicate healthy donors ( $n = 7$ ) and red dots indicate patients with MPA ( $n = 8$ ). Values are means with SEMs and nominal  $P$ -values are calculated using a two-sided Mann-Whitney U test.

The color-coded columns indicate cell types. **(b)** Individual UMAP plots of PBMCs derived from each study participant. Each cellular cluster was manually annotated based on surface marker expression. **(c)** Percentage of each cellular subpopulation relative to the total number of PBMCs. Blue dots indicate healthy donors ( $n = 7$ ) and red dots indicate patients with MPA ( $n = 8$ ). Values are means with SEMs and nominal  $P$ -values are calculated using a two-sided Mann-Whitney U test.

**Supplementary Fig. 3. UMAP plots of monocytes derived from each study participant.**

**a**

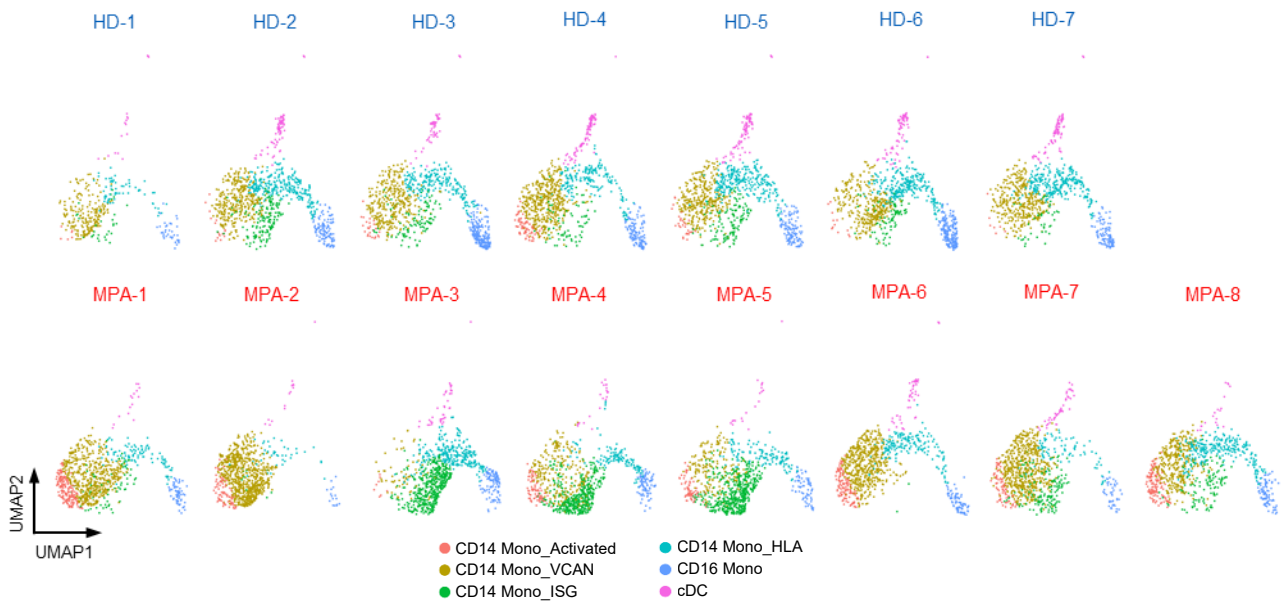

**b**

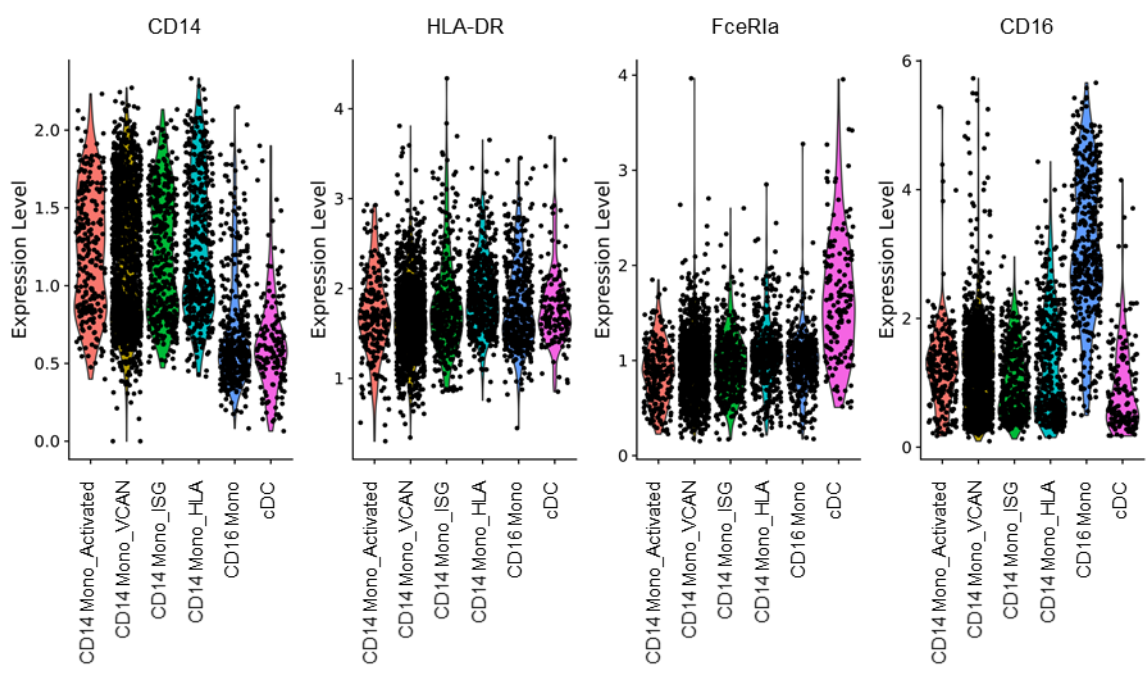

**(a)** UMAP plots showing the monocyte subpopulations in each study participant. Six cellular clusters were identified as shown in Fig. 2a. **(b)** Violin plots showing the scaled expression of representative cellular indexing of transcriptomes and epitopes (CITE) proteins that characterize each cellular cluster.

# Supplementary Fig. 4. UMAP plots of CD8<sup>+</sup> T cells derived from each study participant.

**a**

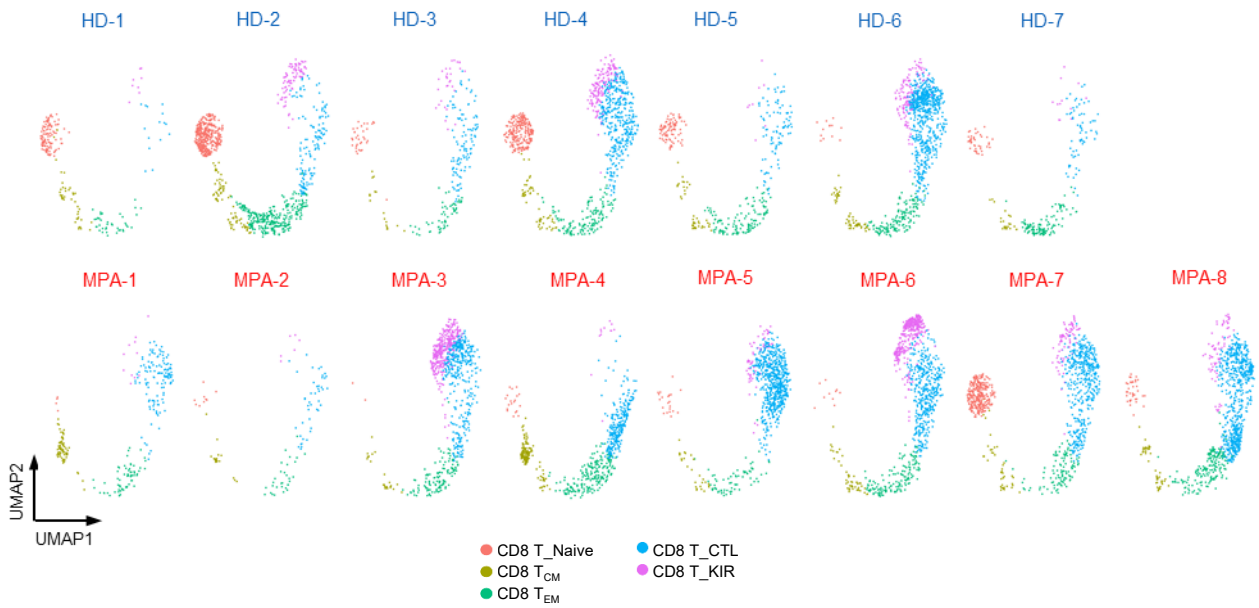

**b**

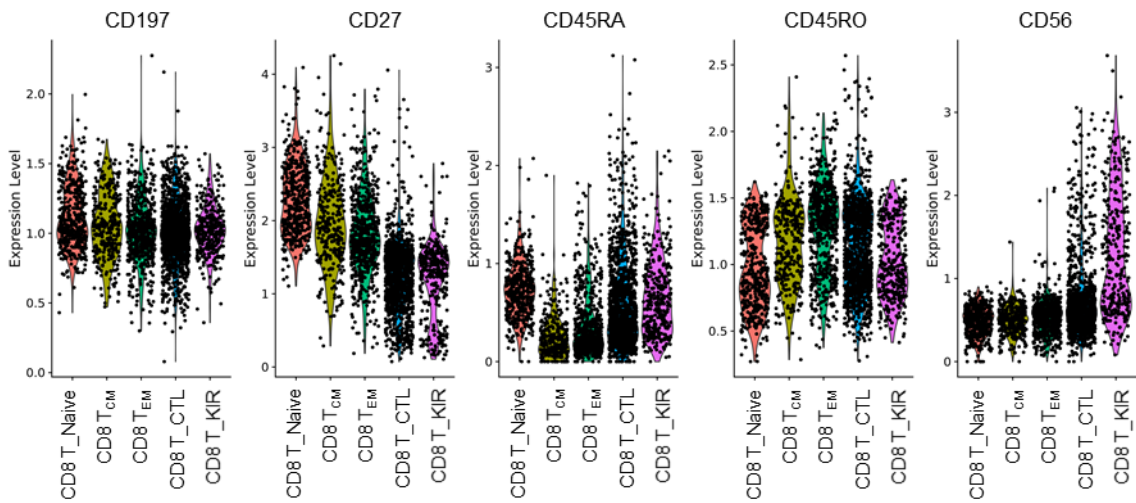

**(a)** UMAP plots showing the CD8<sup>+</sup> T cell subpopulations in each study participant. Five cellular clusters were identified as shown in **Fig. 2e**. **(b)** Violin plots showing the scaled expression of representative cellular indexing of transcriptomes and epitopes (CITE) proteins that characterize each cellular cluster.



## Supplementary Fig.5. UMAP plots and differential abundance analysis of B cells.

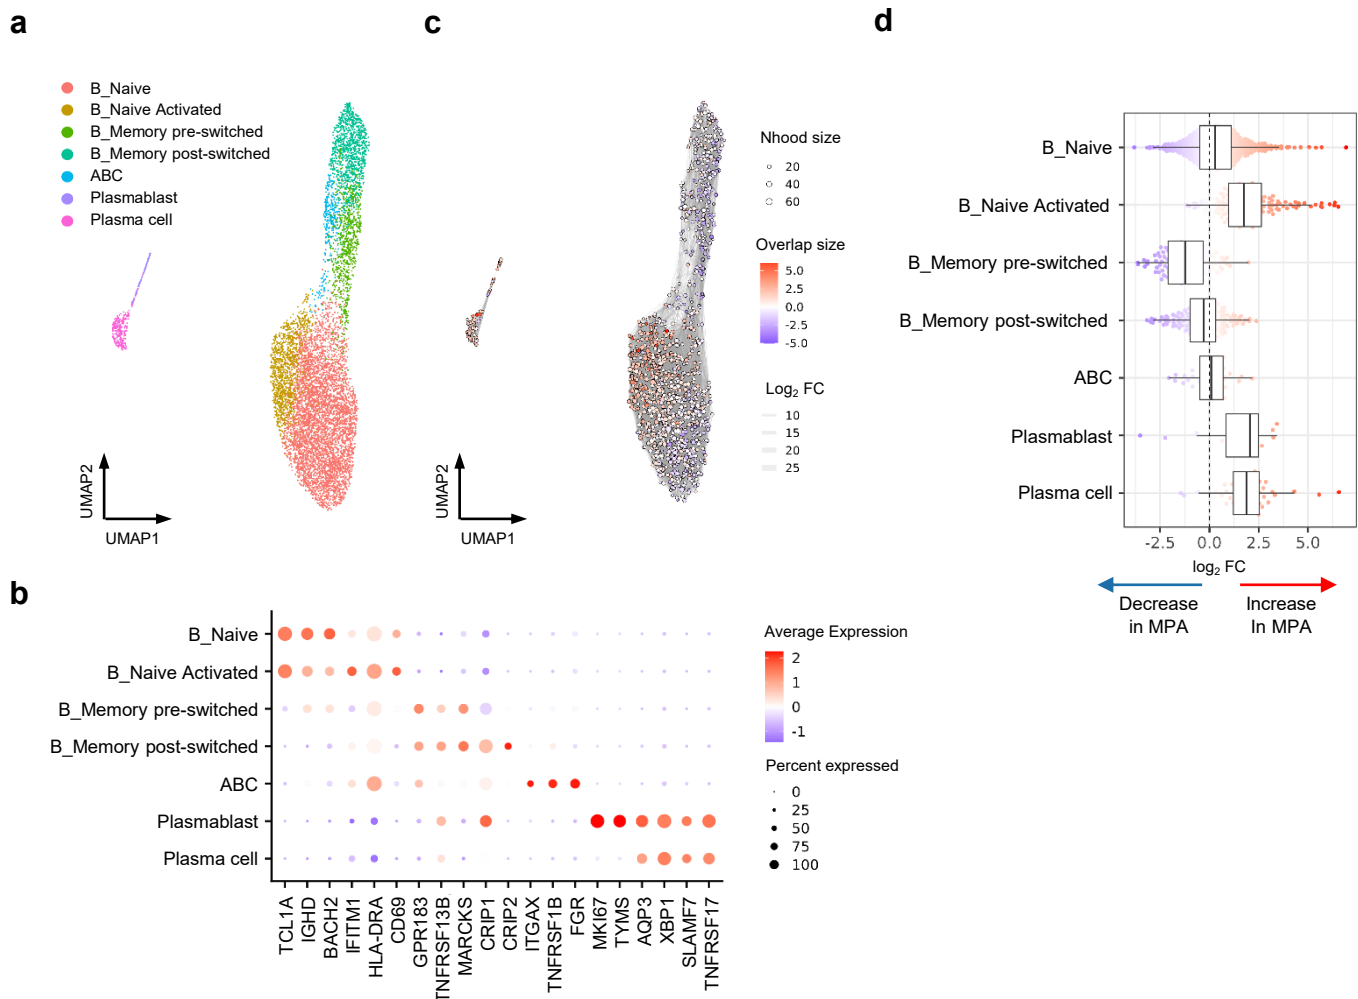

**(a)** UMAP plots showing the B cell subpopulations in a total of 15 study participants including healthy donors ( $n = 7$ ) and patients with MPA ( $n = 8$ ). Seven cellular clusters were identified; naïve B cells (B\_Naive), activated naïve B cells (B\_Naive Activated), pre-switched memory B cells (B\_Memory pre-switched), post-switched memory B cells (B\_Memory post-switched), age-associated B cells (ABC), plasmablasts (Plasmablast), and plasma cells (Plasma cell). **(b)** Balloon plot showing highly expressed gene in each B cell population shown in **(a)**. Balloon color indicates the averaged scaled expression of the indicated genes. Balloon size indicates the percentage of cells expressing the indicated genes. **(c)** Neighborhood graph of B cells using Milo differential abundance testing. Nodes represent neighborhoods from the B cell population. Colors indicate the log<sub>2</sub>-fold difference between patients with MPA and healthy donors. Neighborhoods that increased in patients with MPA are shown in red. Neighborhoods decreased in patients with MPA are shown in blue. **(d)** Beeswarm and box plots showing the distribution of log<sub>2</sub>-fold differences in neighborhoods in different cell type clusters. Colors are represented similarly to **(c)**. Box plots are created in a similar fashion as in **Fig. 1f**.

**Supplementary Fig. 6. Cydar analysis on monocyte subsets of CyTOF data.**

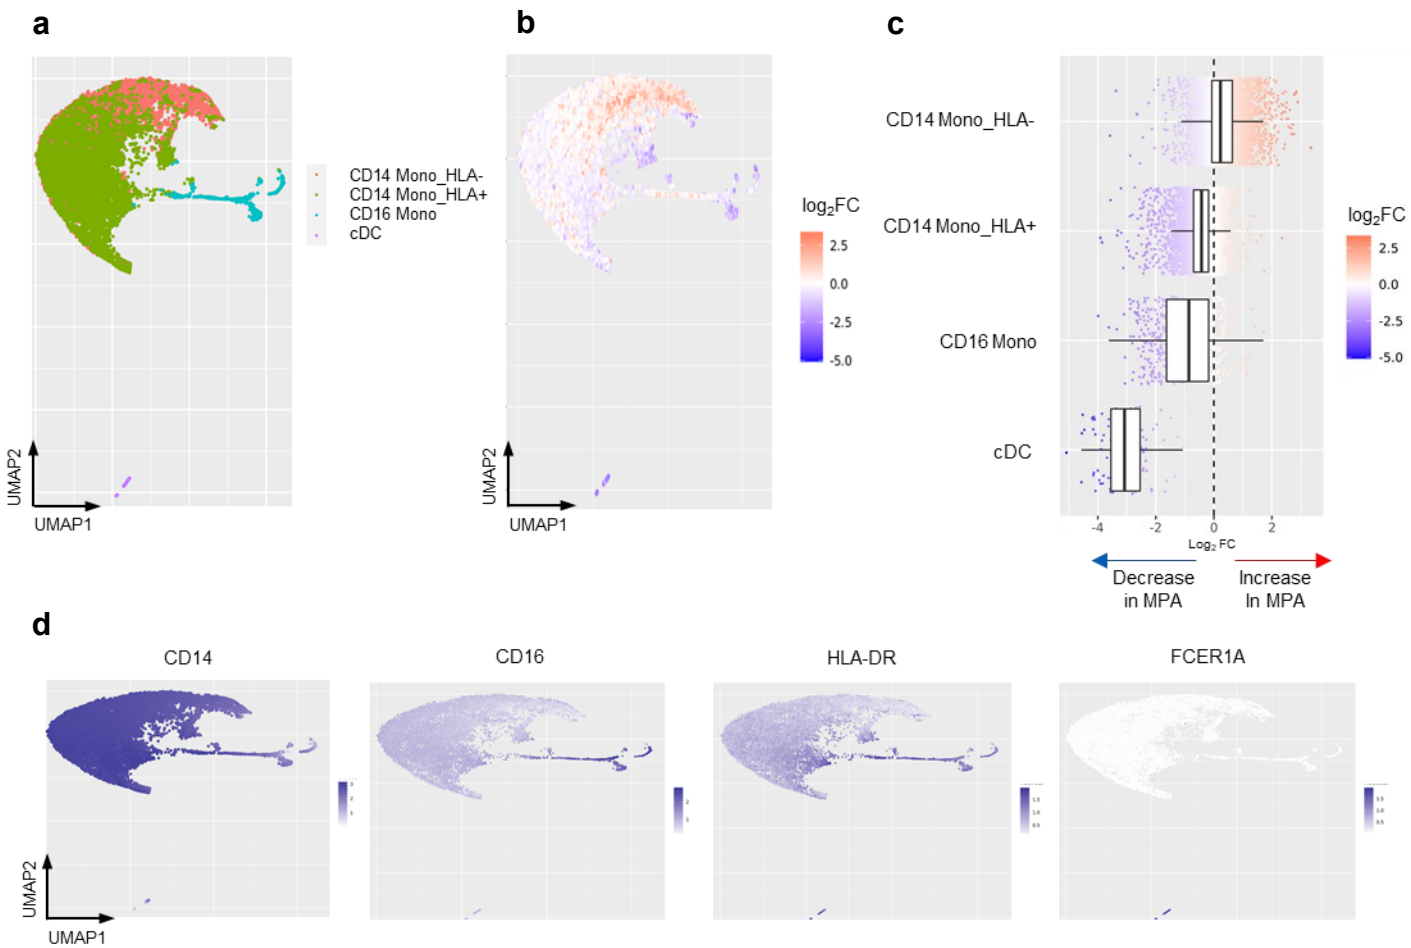

**(a)** UMAP plots showing CyTOF data of monocytes derived from a total of 15 study participants including healthy donors ( $n = 7$ ) and patients with MPA ( $n = 8$ ). Each cellular cluster was manually annotated based on surface marker expression. **(b)** Neighborhood graph of monocytes based on Cydar differential abundance testing. Nodes represent neighborhoods from the monocyte population. Colors indicate  $\log_2$ -fold differences between patients with MPA and healthy donors. Neighborhoods that increased in patients with MPA are shown in red. Neighborhoods decreased in patients with MPA are shown in blue. **(c)** Beeswarm and box plots showing the distribution of  $\log_2$ -fold differences in neighborhoods in different cell type clusters. Colors are represented similarly to **(b)**. **(d)** Feature plots of surface proteins based on Cydar analysis of monocytes. Each dot represents a hypersphere from the monocyte population. The average expression level of each protein on the cells included in each hypersphere was calculated. Box plots are created in a similar fashion as in **Fig. 1f**.

**Supplementary Fig. 7. Cydar analysis on CD8<sup>+</sup> T cell subsets of CyTOF data.**

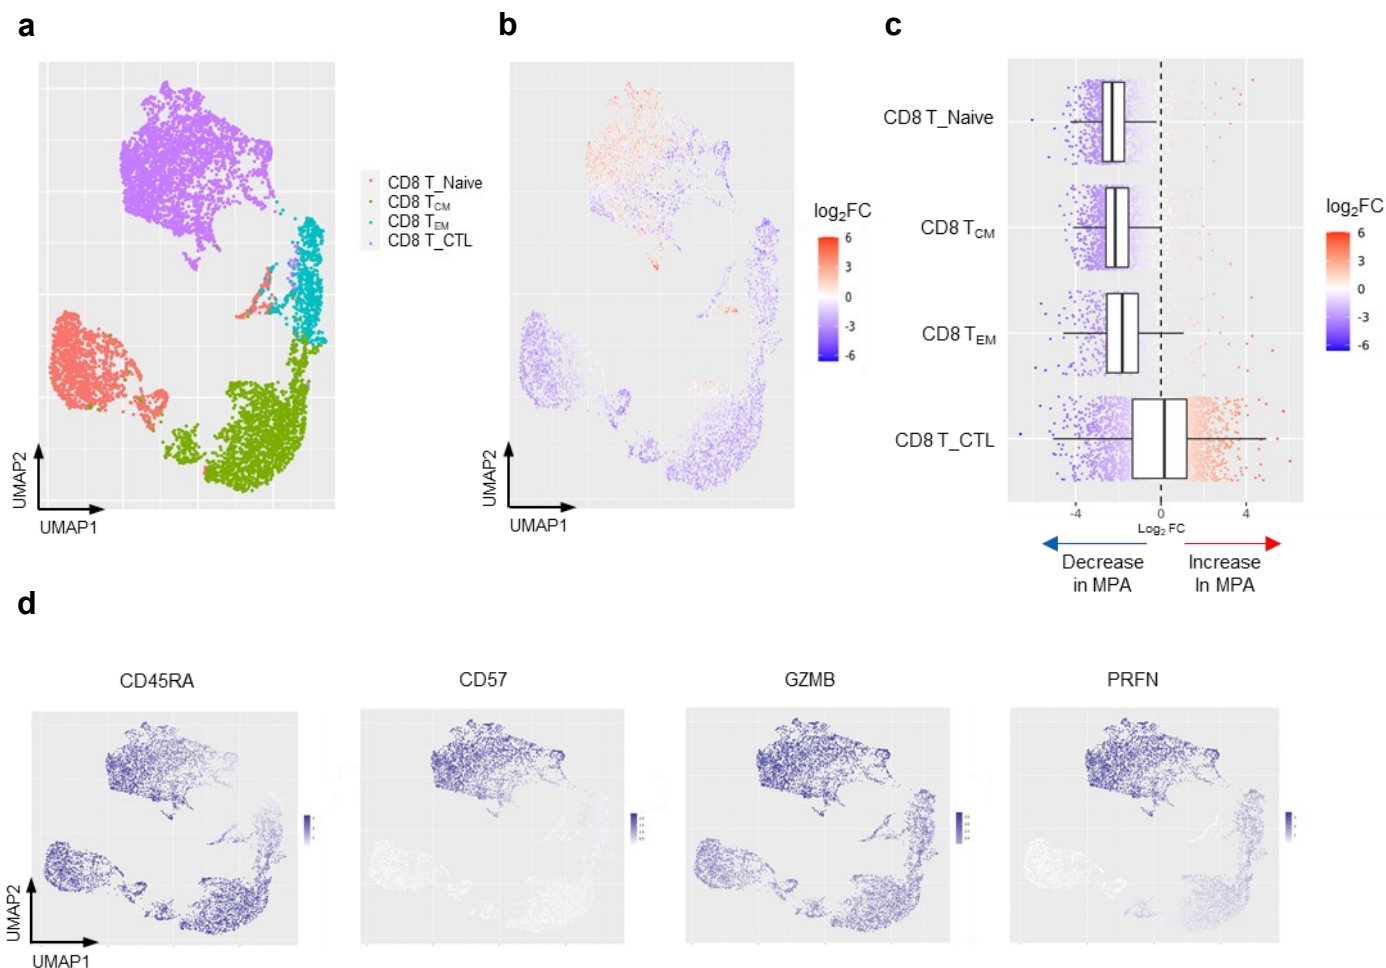

**(a)** UMAP plots showing CyTOF data of CD8<sup>+</sup> T cells derived from a total of 15 study participants including healthy donors (n = 7) and patients with MPA (n = 8). Each cellular cluster was manually annotated based on surface marker expression. **(b)** Neighborhood graph of CD8<sup>+</sup> T cells based on Cydar differential abundance testing. Nodes represent neighborhoods from the CD8<sup>+</sup> T cell population. Colors indicate log<sub>2</sub>-fold differences between patients with MPA and healthy donors. Neighborhoods that increased in patients with MPA are shown in red. Neighborhoods decreased in patients with MPA are shown in blue. **(c)** Beeswarm and box plots showing the distribution of log<sub>2</sub>-fold differences in neighborhoods in different cell type clusters. Colors are represented similarly to **(b)**. **(d)** Feature plots of surface proteins based on Cydar analysis of CD8<sup>+</sup> T cells. Each dot represents a hypersphere from the CD8<sup>+</sup> T cell population. The average expression level of each protein on the cells included in each hypersphere was calculated. CD45RA and CD57 are surface proteins. GZMB and PRF1 are intracellular cytokines. GZMB: Granzyme B, PRF1: Perforin1. Box plots are created in a similar fashion as in **Fig. 1f**.

**Supplementary Fig. 8. Heatmaps of interferon signature genes in each subset of PBMC.**

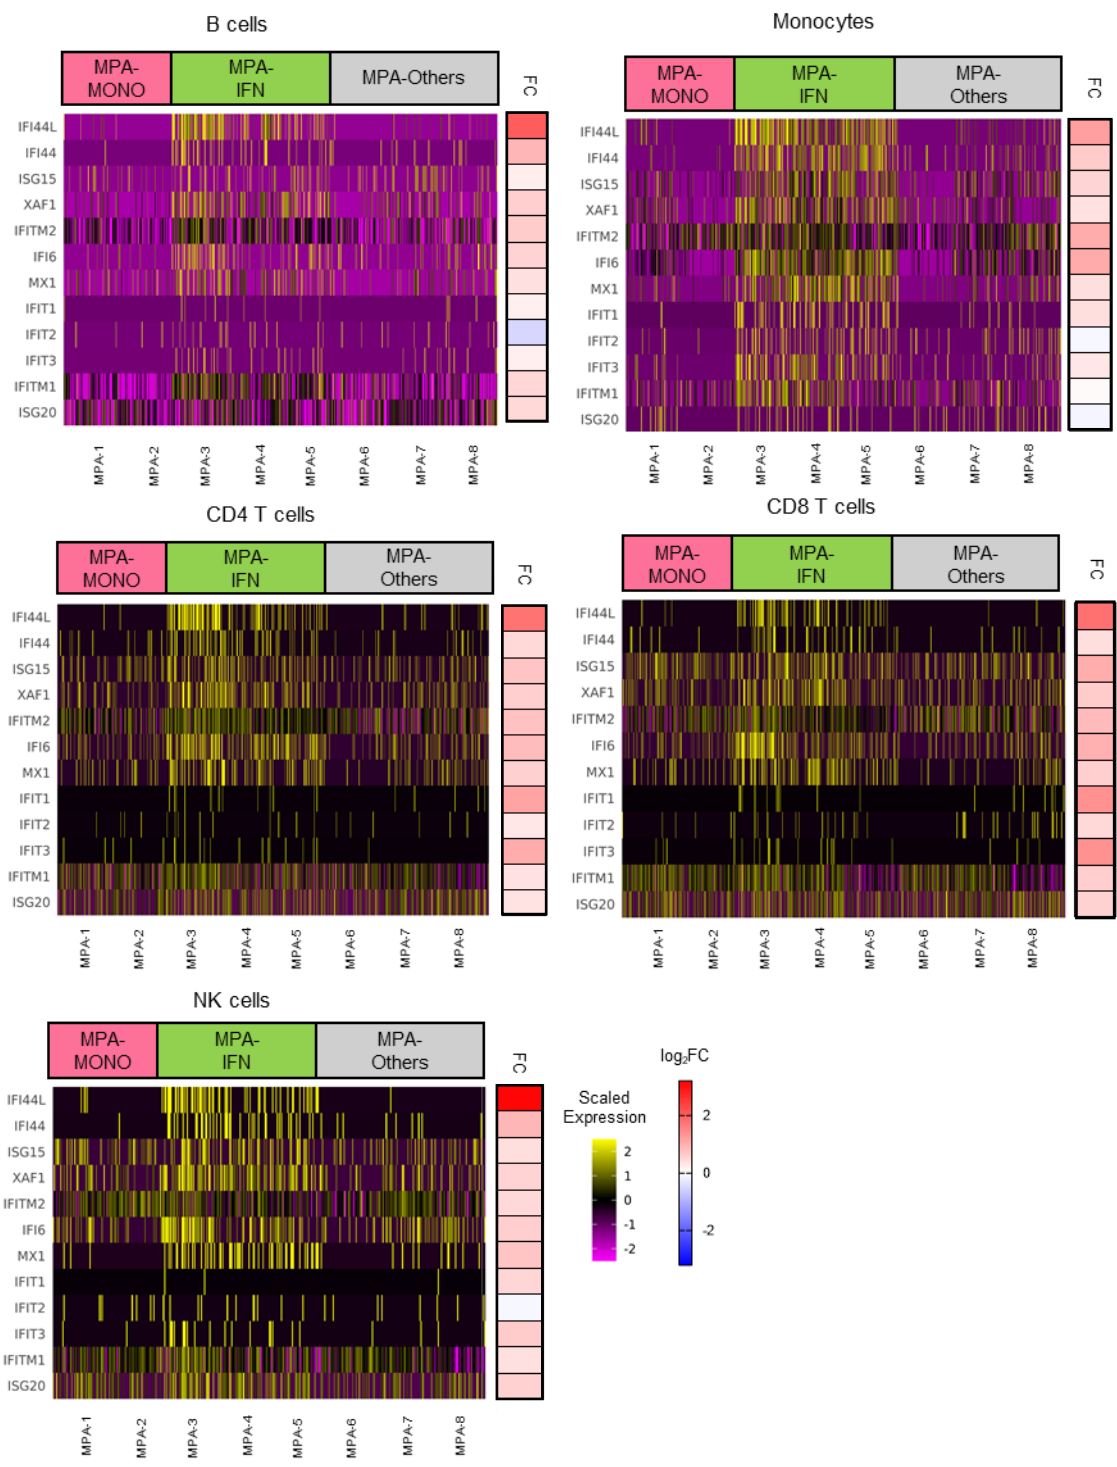

Heatmap showing the scaled expression of interferon signature genes (ISGs) in B cells, monocytes, CD4+ T cells, CD8+ T cells, and natural killer (NK) cells at the single-cell level. Each column represents a patient with MPA. Log<sub>2</sub>-fold difference in the average expression of each ISG between MPA-MONO (MPA-1 and MPA-2) and MPA-ISG (MPA-3, MPA-4, and MPA-5) is shown.

**Supplementary Fig. 9. Population and pathway analysis of B cells derived from each study participant.**

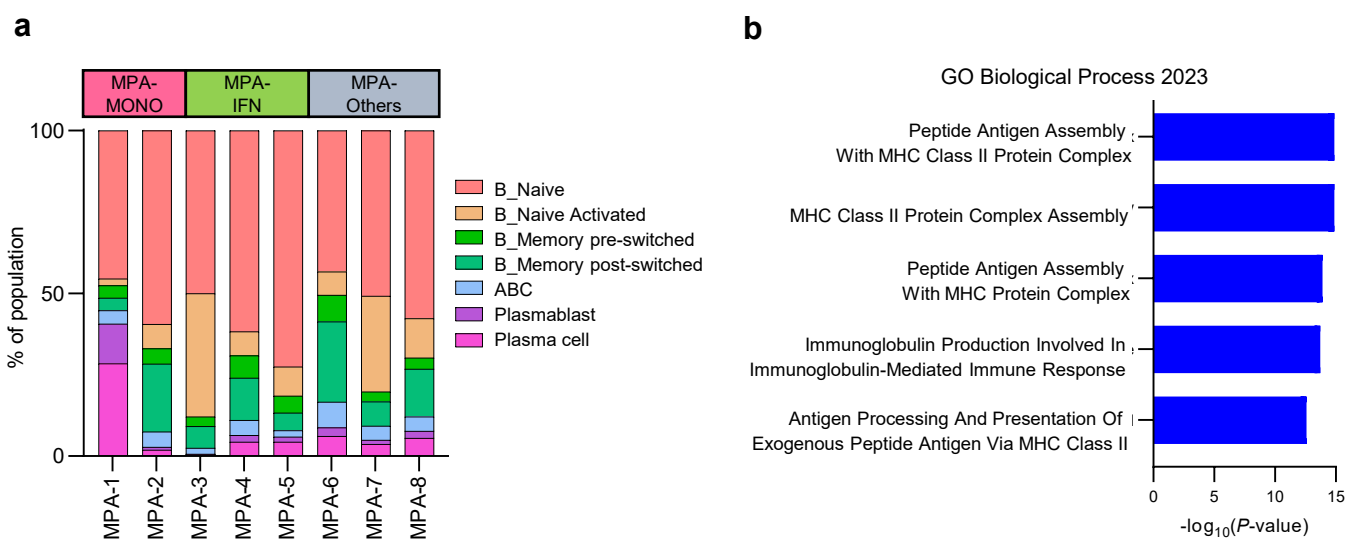

**(a)** Bar plots showing the proportion of each B cell subpopulation relative to total number of B cells. Each subpopulation was annotated in a similar fashion as in **Supplementary Fig. 5a**. **(b)** Gene set enrichment analysis of differentially expressed genes from patients in MPA-IFN group using GO Biological Process 2023. The pathway analysis was performed based on the top 50 genes significantly upregulated in B cells derived from patients in MPA-IFN group compared to patients in MPA-MONO. *P*-values for each pathway were calculated by Benjamini-Hochberg method.

# Supplementary Fig. 10. Module scoring analysis of the monocyte subpopulations.

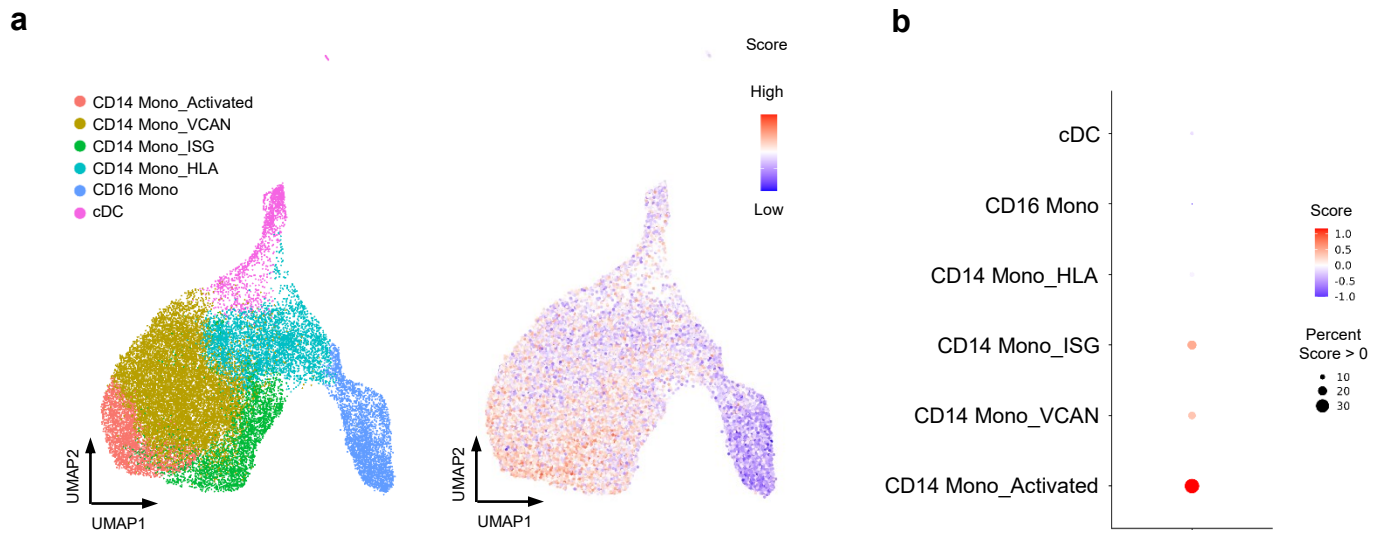

**(a)** Module scoring analysis of the monocyte subpopulations. The module score was calculated using gene signatures of a specific monocyte subset, previously reported as immature and newly mobilized from the bone marrow during inflammation (Reference No. 24). Each cell was colored according to the scaled module score. **(b)** Balloon plot showing the averaged module score in each monocyte subpopulation, as shown in **(a)**.

**Supplementary Fig. 11. Correlation between clinical parameters and CITE-seq-based gene signature scores.**

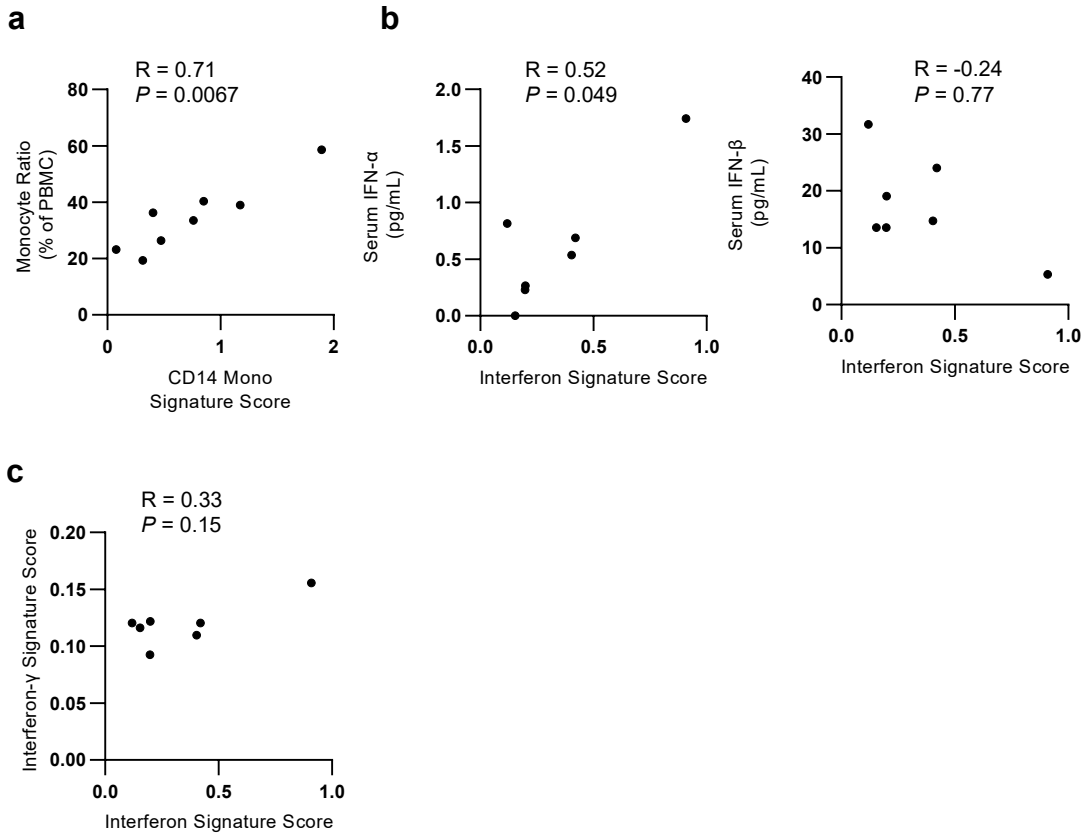

**(a)** Correlation between monocyte ratio in the blood cell count relative to the number of PBMCs and CD14<sup>+</sup> monocyte signature scores. **(b)** Correlations between serum IFN- $\alpha$  / IFN- $\beta$  concentrations and interferon signature gene scores. **(c)** Correlations between IFN- $\gamma$  signature gene score and interferon signature gene scores. Correlations and *P*-values were quantified using Kendall's correlation coefficients (*R*).

**Supplementary Fig. 12. Classification of the MPA-MONO and MPA-IFN groups among 28 patients with newly-onset MPA.**

**a**

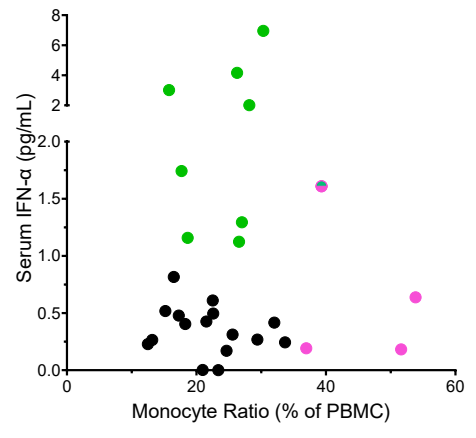

**b**

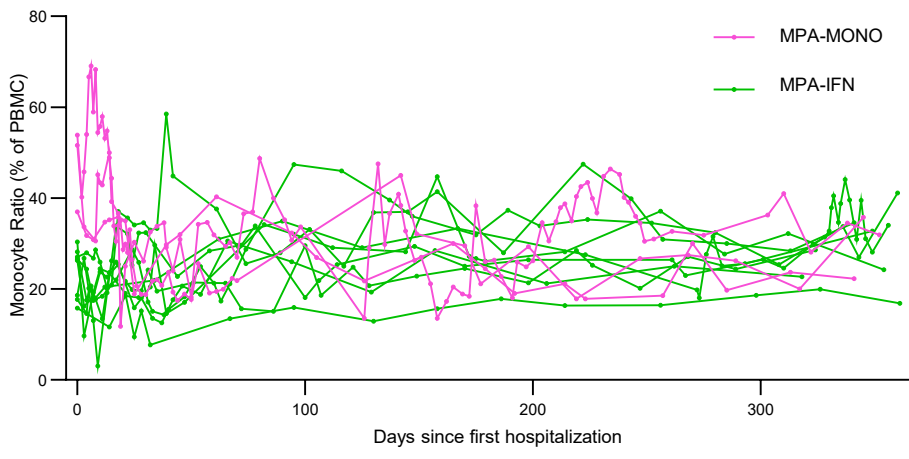

**(a)** Serum IFN- $\alpha$  concentrations and the percentage of monocytes among PBMCs in the complete blood count of samples from patients with MPA (only newly-onset patients,  $n = 28$ ). The 3 samples with the highest percentage of monocytes were classified as MPA-MONO (pink colored dots). The 8 samples with the highest IFN- $\alpha$  concentrations were classified as MPA-IFN (green colored dots). **(b)** The monocyte ratio in newly-diagnosed MPA-MONO ( $n = 3$ ) and MPA-IFN ( $n = 8$ ) patients, tracked over a one-year period since first hospitalization.



**Supplementary Fig. 13. Pre-processing of FCS files to select for live single cells.**

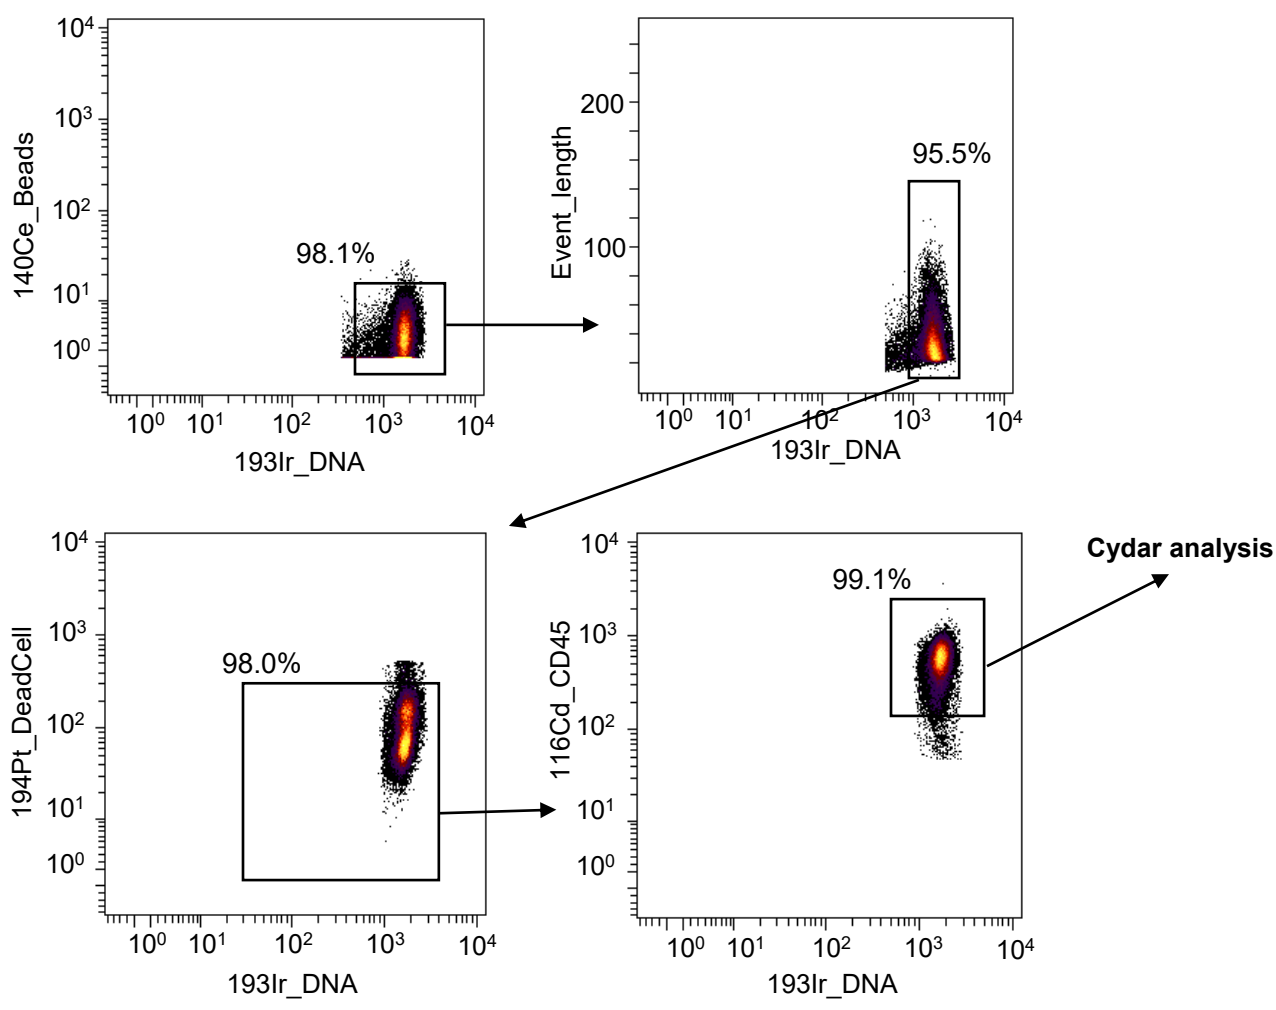

The gating strategy for pre-processing FCS files to remove normalization beads and debris, and to select for live single cells. FCS files containing only live cells were exported for subsequent Cydar analysis.
